# Supplementary material for: Cell growth and protein expression of Shewanella oneidensis in biofilms and hydrogel-entrapped cultures
Source: Royal Society of Chemistry journal article supplement (doi:10.1039/c3mb70520j), 2014-02-20
Supplement: c3mb70520j1.xlsx [file c3mb70520j1.xlsx]

## Sheet: Sheet2
locus tag	Accession	gene	protein description	Ratio (115:116)	Pval (115:116)	%Cov(95)	Peptides(95%)
SOA0144	gi|24345263	tnpAISSod5	ISSod4 transposase, TnpAISSod451			5.5	2
SOA0130	gi|24345246	tnpAISSod4	ISSod4 transposase, TnpAISSod450			5.5	2
SOA0083	gi|24345199	tnpAISSod4	ISSod4 transposase, TnpAISSod448			5.5	2
SOA0061	gi|24345180	repA	plasmid stability/partitioning determinant			7.895	2
SOA0060	gi|24376288		acetyltransferase	0.794328	0.504714	22.29	5
SOA0048	gi|24376276		prolyl oligopeptidase family protein	1.61436	0.24658	16.36	10
SOA0041	gi|24344841	pemK	toxin module of toxin-antitoxin system, mRNA endonuclease-like, PemK			11.43	2
SO4758	gi|81170576	mnmG	tRNA uridine 5-carboxymethylaminomethyl modification; Glucose-inhibited division protein A enzyme MnmG; Glucose-inhibited division protein A	0.787046	0.659061	3.498	2
SO4756	gi|24376228	parA	ParA family protein	0.731139	0.601512	6.107	2
SO4751	gi|81744607	atpF	ATP synthase subunit b; ATP synthase F(0) sector subunit b; ATPase subunit I; F-type ATPase subunit b; F-ATPase subunit b	1.69044	0.388658	16.67	3
SO4749	gi|81588953	atpA	ATP synthase subunit alpha; ATP synthase F1 sector subunit alpha; F-ATPase subunit alpha	0.870964	0.473871	18.71	10
SO4748	gi|81744608	atpG	ATP synthase gamma chain; ATP synthase F1 sector gamma subunit; F-ATPase gamma subunit	1.10662	0.615635	23.43	5
SO4747	gi|81588954	atpD	ATP synthase subunit beta; ATP synthase F1 sector subunit beta; F-ATPase subunit beta	0.887156	0.750847	36.07	22
SO4745	gi|81588955	glmU	Bifunctional protein GlmU; Includes: UDP-N-acetylglucosamine pyrophosphorylase; N-acetylglucosamine-1-phosphate uridyltransferase; Includes: Glucosamine-1-phosphate N-acetyltransferase	0.963829	0.977038	4.185	2
SO4743	gi|24376215		TonB-dependent receptor	3.13329	0.384177	7.681	4
SO4741	gi|32129550	glmS	Glucosamine--fructose-6-phosphate aminotransferase [isomerizing]; D-fructose-6-phosphate amidotransferase; GFAT; Glucosamine-6-phosphate synthase; Hexosephosphate aminotransferase; L-glutamine-D-fructose-6-phosphate amidotransferase	1.1695	0.720405	10.84	7
SO4739	gi|24351268	menB	naphthoate synthase			12.33	3
SO4730	gi|24376202	hemN	coproporphyrinogen III oxidase	0.691831	0.371684	17.9	10
SO4723	gi|24351246	moeA	molybdopterin biosynthesis MoeA protein, putative			8.681	4
SO4719	gi|24376191	tupA	hypothetical protein SO4719	`	0.000833657	68.98	58
SO4707	gi|24351224	tnpA	ISSod4, transposase			5.5	2
SO4702	gi|24351219	gor	glutathione reductase			11.53	5
SO4699	gi|24351215	prlC	oligopeptidase A			18.56	10
SO4693	gi|24351209	vmeA	multidrug resistance protein, AcrA/AcrE family			15.45	5
SO4674	gi|24376146	kbl	2-amino-3-ketobutyrate CoA ligase	0.586138	0.313724	30.73	12
SO4673	gi|29427464	tdh	L-threonine 3-dehydrogenase	0.619441	0.272156	17.3	5
SO4667	gi|81588968	engB	Probable GTP-binding protein EngB			12.33	3
SO4662	gi|24376134		hypothetical protein SO4662	2.208	0.277363	5.319	2
SO4659	gi|24351171	yhiR	conserved hypothetical protein			8.185	2
SO4644.1	gi|28275294		hypothetical protein SO4644.1	1.11686	0.687245	3.607	2
SO4640	gi|24376113		anti-oxidant AhpCTSA family protein	1.30617	0.510176	9.494	2
SO4586	gi|24351075	ftsY	cell division protein FtsY			4.51	2
SO4582	gi|24351071	tnpA	ISSod4, transposase			5.5	2
SO4545	gi|24351025	tnpA	ISSod4, transposase			5.5	2
SO4537.2	gi|28275293		Zn-dependent peptidase	1.95885	0.331823	20.09	6
SO4537	gi|24376012		peptidase	0.648634	0.425674	9.926	6
SO4516	gi|24375993		ferric vibriobactin receptor	1.58489	0.442632	18.98	10
SO4513	gi|24375990	fdhA	formate dehydrogenase subunit alpha	0.772681	0.646024	2.632	2
SO4506	gi|24375983		(Fe-S)-binding protein	0.185353	0.0986021	11.11	7
SO4502	gi|24375979		hypothetical protein SO4502	0.711214	0.526915	2.658	2
SO4492	gi|24375970		hypothetical protein SO4492	1.95885	0.145354	29.41	6
SO4480	gi|24375958	exaC	aldehyde dehydrogenase	3.43558	0.0736611	16.21	9
SO4473	gi|24375951		outer membrane protein	2.63027	0.243693	20.21	3
SO4453	gi|24350913	etfQ	electron transfer flavoprotein-ubiquinone oxidoreductase, putative			4.918	2
SO4428	gi|24375906		DNA-binding response regulator	1.34276	0.578999	12	2
SO4410	gi|24375890	glnA	glutamine synthetase	0.954993	0.973738	24.52	12
SO4408	gi|24375888	bipA	virulence regulator BipA	1.8197	0.119252	17.25	11
SO4405	gi|81744633	katG1	Catalase-peroxidase 1; CP 1; Peroxidase/catalase 1; Flags: Precursor	0.60256	0.455489	3.297	3
SO4391	gi|24350841		hypothetical protein SO4391			9.426	2
SO4386	gi|24350834	tnpA	ISSod4, transposase			5.5	2
SO4384	gi|24350832		hypothetical protein SO4384			27.53	6
SO4374	gi|24375855		histidine ammonia-lyase	1.49969	0.484627	2.303	2
SO4371	gi|24350814		conserved hypothetical protein			4.405	2
SO4343	gi|24375824	agxT	class V aminotransferase	0.870964	0.628384	39.42	15
SO4334	gi|24350769	creD	inner membrane protein, putative			6.181	2
SO4327	gi|24375809	vexB	HlyD family secretion protein	2.46604	0.386555	5.645	2
SO4320	gi|24375802	aggA	agglutination protein	2.72898	0.00567749	10.62	6
SO4317	gi|24375799	bpfA	RTX toxin	3.16228	0.0446052	5.347	10
SO4313	gi|39931562	hemC	Porphobilinogen deaminase; PBG; Hydroxymethylbilane synthase; HMBS; Pre-uroporphyrinogen synthase	0.758578	0.875835	28.71	11
SO4309	gi|24375791	lysA	diaminopimelate decarboxylase	2.14783	0.302805	15.22	5
SO4259	gi|24350684	tnpA	ISSod4, transposase			5.5	2
SO4257	gi|24350682		conserved hypothetical protein TIGR00255			8.014	2
SO4255	gi|30173286	pyrE	Orotate phosphoribosyltransferase; OPRT; OPRTase	0.928966	0.896701	11.16	4
SO4247	gi|67461528	rpmB	50S ribosomal protein L28	1.45881	0.465403	24.36	3
SO4223	gi|24350642	murF	UDP-N-acetylmuramoylalanyl-D-glutamyl-2,6-diaminopimelate--D-alanyl-D-alanyl ligase			6.522	2
SO4221	gi|30316031	murD	UDP-N-acetylmuramoylalanine--D-glutamate ligase; D-glutamic acid-adding enzyme; UDP-N-acetylmuramoyl-L-alanyl-D-glutamate synthetase	1.21339	0.592568	8.656	4
SO4215	gi|24350632	ftsZ	cell division protein FtsZ			15.95	5
SO4211	gi|81845734	secA	Protein translocase subunit SecA	0.847227	0.768625	13.77	10
SO4208	gi|24350619	hemB	delta-aminolevulinic acid dehydratase			8.929	3
SO4197	gi|37088830	rraA	Regulator of ribonuclease activity A	0.586138	0.410496	6.832	2
SO4190	gi|24375675	ppaC	manganese-dependent inorganic pyrophosphatase	0.591562	0.240099	14.05	7
SO4165	gi|24350565	tnpA	ISSod4, transposase			5.5	2
SO4163	gi|32129630	hslU	ATP-dependent protease ATPase subunit HslU; Unfoldase HslU	0.794328	0.385666	12.27	6
SO4162	gi|34222561	hslV	ATP-dependent protease subunit HslV			7.471	2
SO4133	gi|24375619	udp	uridine phosphorylase	0.564937	0.102452	35.32	19
SO4129	gi|24375615		hypothetical protein SO4129	1.55597	0.452814	6.109	2
SO4123	gi|38372524	argS	Arginine--tRNA ligase; Arginyl-tRNA synthetase; ArgRS	0.937562	0.47517	22.38	12
SO4118	gi|24350501	maeB	malate oxidoreductase, putative			6.763	2
SO4106	gi|24350485	mshB	MSHA pilin protein MshB			13.17	2
SO4105	gi|24375592	mshA	MSHA pilin protein MshA	1.5417	0.364657	45.61	10
SO4098	gi|24350474	mreB	rod shape-determining protein MreB			12.32	3
SO4091	gi|24350467	tldD	tldD protein			4.564	2
SO4077	gi|24375564		TonB-dependent receptor	7.65597	0.171826	4.237	3
SO4066	gi|39931972	purC	Phosphoribosylaminoimidazole-succinocarboxamide synthase; SAICAR synthetase	0.895365	0.854607	30.79	11
SO4053	gi|24350416		methyl-accepting chemotaxis protein			3.312	2
SO4034	gi|24350394	deaD	ATP-dependent RNA helicase DeaD			5.778	3
SO4028	gi|37999432	ssb	Single-stranded DNA-binding protein; SSB; Helix-destabilizing protein	0.847227	0.664448	10.08	6
SO4003	gi|24350350		response regulator			11.48	3
SO3994	gi|24375481		hypothetical protein SO3994	0.963829	0.985617	6.49	2
SO3991	gi|81845746	fbp	Fructose-1,6-bisphosphatase class 1; FBPase class 1; D-fructose-1,6-bisphosphate 1-phosphohydrolase class 1	0.597035	0.403452	21.23	6
SO3990	gi|24350330	dpp4	dipeptidyl peptidase IV			2.359	2
SO3988	gi|24350328	arcA	aerobic respiration control protein ArcA			57.56	27
SO3967	gi|24350302		molybdenum ABC transporter, periplasmic molybdenum-binding protein, putative			11.67	6
SO3962	gi|24350297	yhbH	ribosomal subunit interface protein			22.11	3
SO3951	gi|24375438	mlaC	hypothetical protein SO3951	0.346737	0.160431	19.35	5
SO3948	gi|81459354	murA	UDP-N-acetylglucosamine 1-carboxyvinyltransferase; Enoylpyruvate transferase; UDP-N-acetylglucosamine enolpyruvyl transferase; EPT			10.02	3
SO3944	gi|24350276	tnpA	ISSod4, transposase			5.5	2
SO3942	gi|24350274	degQ	serine protease, HtrA/DegQ/DegS family			43.56	17
SO3940	gi|81744665	rplM	50S ribosomal protein L13	1.2942	0.453566	28.17	4
SO3939	gi|39932200	rpsI	30S ribosomal protein S9			24.62	9
SO3937	gi|30173288	purA	Adenylosuccinate synthetase; AMPSase; AdSS; IMP--aspartate ligase	0.912011	0.904471	16.94	9
SO3934	gi|52783315	rlmB	23S rRNA (guanosine-2'-O-)-methyltransferase RlmB; 23S rRNA (guanosine2251 2'-O)-methyltransferase; 23S rRNA Gm2251 2'-O-methyltransferase	1.04713	0.967162	15.04	4
SO3930	gi|32171551	rpsF	30S ribosomal protein S6	1.02802	0.967831	16.79	2
SO3927	gi|81589041	rplI	50S ribosomal protein L9	1.01859	0.910077	57.33	20
SO3918	gi|24375406		hypothetical protein SO3918	2.24905	0.259459	14.34	7
SO3914	gi|24375402		TonB-dependent receptor	7.04693	0.00152133	17.12	12
SO3906	gi|24350228		conserved hypothetical protein			6.211	2
SO3904	gi|24375392	tolC	outer membrane channel protein	1.48594	0.238173	37.24	19
SO3896	gi|24375384	omp35	outer membrane porin	0.280543	0.00231709	64.77	34
SO3876	gi|24350188	tnpA	ISSod4, transposase			5.5	2
SO3863	gi|24350173	modA	molybdenum ABC transporter, periplasmic molybdenum-binding protein			40.94	11
SO3858	gi|24350165	tnpA	ISSod4, transposase			5.5	2
SO3855	gi|81744671	maeA	NAD-dependent malic enzyme; NAD-ME	1.24738	0.188222	14.95	10
SO3852	gi|24350159		conserved hypothetical protein			13.64	2
SO3844	gi|24375333	pepO	M13 family peptidase	3.59749	1.97185e-05	29.97	25
SO3842	gi|24375332		hypothetical protein SO3842	1.02802	0.942935	25.47	9
SO3837	gi|32469723	prs	Ribose-phosphate pyrophosphokinase; RPPK; Phosphoribosyl pyrophosphate synthase; P-Rib-PP synthase; PRPP synthase	0.510505	0.430918	8.254	3
SO3833	gi|32171552	prfA	Peptide chain release factor 1; RF-1	1.01859	0.957102	8.815	2
SO3827	gi|37999694	kdsA	2-dehydro-3-deoxyphosphooctonate aldolase; 3-deoxy-D-manno-octulosonic acid 8-phosphate synthase; KDO-8-phosphate synthase; KDO 8-P synthase; KDOPS; Phospho-2-dehydro-3-deoxyoctonate aldolase	1.49969	0.49588	22.34	5
SO3812	gi|24350112	ppiA	peptidyl-prolyl cis-trans isomerase A			23.59	4
SO3805	gi|24350105	mpl	UDP-N-acetylmuramate:L-alanyl-gamma-D-glutamyl-meso-diaminopimelate ligase			12.26	4
SO3800	gi|24375293		serine protease	2.48886	0.339813	3.21	4
SO3775	gi|24350071		hypothetical protein SO3775			9.426	2
SO3774	gi|24350070	putA	proline dehydrogenase/delta-1-pyrroline-5-carboxylate dehydrogenase, putative			25.4	28
SO3772	gi|24350068		conserved hypothetical protein			28.57	3
SO3770	gi|24375264		hypothetical protein SO3770	1.0666	0.838233	19.47	5
SO3765	gi|24375259		hypothetical protein SO3765	1.39316	0.402436	18.78	3
SO3743	gi|24375239		TetR family transcriptional regulator	4.36516	0.151895	40.88	8
SO3740	gi|24375236	pntA	NAD(P) transhydrogenase subunit alpha	0.704693	0.427081	8.661	3
SO3740	gi|24350028	pntA	NAD(P) transhydrogenase, alpha subunit			8.661	3
SO3737	gi|81459628	cysI	Sulfite reductase [NADPH] hemoprotein beta-component; SiR-HP; SiRHP	0.990832	0.963542	6.195	4
SO3736	gi|29336674	cysH	Phosphoadenosine phosphosulfate reductase; 3'-phosphoadenylylsulfate reductase; PAPS reductase, thioredoxin dependent; PAPS sulfotransferase; PAdoPS reductase	1.44544	0.508653	5.714	2
SO3733	gi|24375229		hypothetical protein SO3733	1.23595	0.575397	23.53	17
SO3715	gi|24375212	nfnB	dihydropteridine reductase	0.654636	0.137088	25.35	6
SO3712	gi|24349997	tnpA	ISSod4, transposase			5.5	2
SO3695	gi|81459701	pyrC	Dihydroorotase; DHOase	1.0666	0.943898	10.5	4
SO3682	gi|24375180		hypothetical protein SO3682	0.275423	0.00553661	14.39	4
SO3681	gi|24375179		universal stress protein	0.260615	0.287467	76.22	21
SO3669	gi|24375167	hmuA	heme transport protein	1.38038	0.586539	20.23	10
SO3668	gi|24375166	hmuX	hypothetical protein SO3668	1.99526	0.324921	26.88	4
SO3667	gi|24375165	hmuZ	hypothetical protein SO3667	3.0761	0.086259	32.43	6
SO3664	gi|24349939	fadD	long-chain-fatty-acid--CoA ligase			12.97	8
SO3652	gi|81744685	rplU	50S ribosomal protein L21	1.10662	0.624026	43.69	7
SO3638	gi|32363322	pdxA	4-hydroxythreonine-4-phosphate dehydrogenase; 4-(phosphohydroxy)-L-threonine dehydrogenase	1.18032	0.667156	4.878	2
SO3637	gi|81744686	surA	Chaperone SurA; Peptidyl-prolyl cis-trans isomerase SurA; PPIase SurA; Rotamase SurA; Flags: Precursor	1.02802	0.690072	9.447	3
SO3604	gi|24349869	tnpA	ISSod4, transposase			5.5	2
SO3602	gi|34222562	cysA1	Sulfate/thiosulfate import ATP-binding protein CysA 1; Sulfate-transporting ATPase 1	2.10863	0.304241	2.926	2
SO3599	gi|24375099	cysP	sulfate ABC transporter substrate-binding protein	0.954993	0.911297	27.76	13
SO3594	gi|24349856	rstA	transcriptional regulatory protein RstA, putative			12.66	4
SO3586	gi|24375086		glyoxalase	1.88799	0.345891	16.67	2
SO3580	gi|24349840	bamC	conserved hypothetical protein			9.328	2
SO3577	gi|54035853	clpB	Chaperone protein ClpB	0.253513	8.46638e-05	30.11	32
SO3564	gi|24349821	dcp	peptidyl-dipeptidase Dcp			5.866	3
SO3560	gi|24375064		M16 family peptidase	2.63027	0.0424083	15.38	12
SO3559	gi|24349814	gshA	glutamate--cysteine ligase			2.305	3
SO3555	gi|24375059	purK	phosphoribosylaminoimidazole carboxylase ATPase subunit	0.809096	0.68052	3.562	2
SO3554	gi|24349806	purE	phosphoribosylaminoimidazole carboxylase, catalytic subunit			15.34	3
SO3549	gi|24375053		hypothetical protein SO3549	0.260615	0.332186	11.8	3
SO3547	gi|31076703	pgi	Glucose-6-phosphate isomerase; GPI; Phosphoglucose isomerase; PGI; Phosphohexose isomerase; PHI	0.928966	0.951323	15.78	7
SO3546	gi|39932201	tal	Transaldolase	0.83946	0.397901	25.79	8
SO3545	gi|24375049		OmpA family protein	0.496592	0.582995	25.14	12
SO3542	gi|24375046	xfp	phosphoketolase	0.630957	0.179247	7.614	7
SO3532	gi|81459913	ileS	Isoleucine--tRNA ligase; Isoleucyl-tRNA synthetase; IleRS	1.01859	0.882026	5.426	7
SO3522	gi|24349767	tnpA	ISSod4, transposase			5.5	2
SO3518	gi|24349763	tnpA	ISSod4, transposase			5.5	2
SO3496	gi|24349737	gabD	aldehyde dehydrogenase			8.032	4
SO3492	gi|24375430	degQ	serine protease	0.855067	0.767717	43.56	17
SO3471	gi|32171465	glyA	Serine hydroxymethyltransferase; SHMT; Serine methylase	1.00925	0.938129	25.66	16
SO3467	gi|24349699	ribBA	3,4-dihydroxy-2-butanone 4-phosphate synthase/GTP cyclohydrolase II, putative			19.35	8
SO3466	gi|48428452	ribH	6,7-dimethyl-8-ribityllumazine synthase; DMRL synthase; LS; Lumazine synthase	0.672977	0.552082	32.28	5
SO3465	gi|32171648	nusB	N utilization substance protein B homolog; Protein NusB	0.847227	0.772335	31.34	3
SO3455	gi|24349682	relA	GTP pyrophosphokinase			6.259	4
SO3443	gi|24349671	tnpA	ISSod4, transposase			5.5	2
SO3441	gi|81460024	pyrG	CTP synthase; CTP synthetase; UTP--ammonia ligase	0.679204	0.360512	22.71	11
SO3440	gi|30315823	eno	Enolase; 2-phospho-D-glycerate hydro-lyase; 2-phosphoglycerate dehydratase	0.328095	0.000537754	50.81	35
SO3430	gi|30173289	recA	Protein RecA; Recombinase A	0.666807	0.360396	27.45	10
SO3428	gi|38372525	alaS	Alanine--tRNA ligase; Alanyl-tRNA synthetase; AlaRS	1.09648	0.364583	16.7	15
SO3424	gi|81460030	valS	Valine--tRNA ligase; Valyl-tRNA synthetase; ValRS	1.00925	0.803966	9.186	7
SO3411	gi|24374921		protease	1.41906	0.320046	6.764	5
SO3403	gi|24349620	raiA	ribosomal subunit interface protein			37.29	4
SO3399	gi|24349616	tnpA	ISSod4, transposase			5.5	2
SO3392	gi|24349607	sye4	oxidoreductase, FMN-binding			21.41	6
SO3363	gi|24349572		transcriptional regulator, LysR family			5.449	2
SO3361	gi|24349570		conserved hypothetical protein			4.228	3
SO3343	gi|24349549		conserved hypothetical protein			14.52	4
SO3341	gi|24374852	tpx	anti-oxidant AhpCTSA family protein	0.401791	0.169824	20.3	3
SO3340	gi|24374851	mscS	small-conductance mechanosensitive channel	1.07647	0.968238	14.18	7
SO3311	gi|32130107	hisS	Histidine--tRNA ligase; Histidyl-tRNA synthetase; HisRS	0.981748	0.803031	12.47	4
SO3299	gi|24374810		Pal/histidase	0.704693	0.541515	4.372	2
SO3293	gi|24349481	guaB	inosine-5'-monophosphate dehydrogenase			30.33	17
SO3292	gi|44887962	guaA	GMP synthase [glutamine-hydrolyzing]; GMP synthetase; Glutamine amidotransferase	0.990832	0.733036	26.67	19
SO3287	gi|32171649	purL	Phosphoribosylformylglycinamidine synthase; FGAM synthase; FGAMS; Formylglycinamide ribotide amidotransferase; FGARAT; Formylglycinamide ribotide synthetase	0.501187	0.0292312	9.745	12
SO3286	gi|24374797	cydA	cytochrome d ubiquinol oxidase, subunit I	0.608135	0.361419	19.5	12
SO3271	gi|24349454	pseB	polysaccharide biosynthesis protein			7.855	2
SO3252	gi|24349429	cheV	chemotaxis protein CheV			8.17	2
SO3238	gi|24349414	fliC	flagellin			37	10
SO3237	gi|24374749	fliC	flagellin	0.128233	0.0183381	44.85	13
SO3207	gi|24374719	cheA	chemotaxis protein	0.505825	0.346104	4.354	2
SO3206	gi|50400525	cheB1	Chemotaxis response regulator protein-glutamate methylesterase of group 1 operon	0.30761	0.18465	7.219	2
SO3202	gi|24349372	cheW	purine-binding chemotaxis protein CheW			25	7
SO3193	gi|24374706	wza	polysaccharide biosynthesis protein	2.22844	0.115115	5.212	5
SO3191	gi|24374704	wzz	chain length determinant protein	1.18032	0.731147	6.991	2
SO3190	gi|24374703	wbpA	polysaccharide biosynthesis protein	0.619441	0.402252	18.78	8
SO3189	gi|24349354	wbpP	polysaccharide biosynthesis protein			27.35	7
SO3185	gi|24349350		polysaccharide biosynthesis protein			15.92	9
SO3184	gi|24374697	wbqC	hypothetical protein SO3184	1.97697	0.174697	19.17	7
SO3183	gi|24374696		perosamine synthetase-like protein	1.33045	0.564922	11.08	4
SO3178	gi|24349340		hypothetical protein SO3178			15.38	4
SO3175	gi|24374688	wbpQ	asparagine synthetase	0.77983	0.967929	8.087	5
SO3154	gi|81845788	proS	Proline--tRNA ligase; Prolyl-tRNA synthetase; ProRS	1.13763	0.867177	33.51	18
SO3146	gi|24349298		DNA-binding protein, H-NS family			52.31	8
SO3145	gi|24374658	etfB	electron transfer flavoprotein subunit beta	1.52757	0.496822	16.47	4
SO3144	gi|24374657	etfA	electron transfer flavoprotein subunit alpha	1	0.985586	11.04	5
SO3142	gi|24349292	dcp	peptidyl-dipeptidase Dcp			11.17	6
SO3128.2	gi|28275253		glutamate tRNA synthetase	0.937562	0.548244	31.15	6
SO3120	gi|81589149	nagA	Alpha-N-acetylgalactosaminidase; Glycosyl hydrolase family 109 protein; Flags: Precursor	1.01859	0.936438	4.575	3
SO3114	gi|46577064	queA	S-adenosylmethionine:tRNA ribosyltransferase-isomerase; Queuosine biosynthesis protein QueA	0.937562	0.868181	4.348	2
SO3113	gi|67461856	tgt	Queuine tRNA-ribosyltransferase; Guanine insertion enzyme; tRNA-guanine transglycosylase	1.10662	0.566198	14.71	5
SO3112	gi|24374631	yajC	preprotein translocase subunit YajC	1.47231	0.496984	19.09	3
SO3111	gi|24349257	secD	protein-export membrane protein SecD			11.04	6
SO3099	gi|24374618		long-chain fatty acid transport protein	0.539511	0.0408265	28.86	14
SO3090	gi|24374610		MoxR domain-containing protein	1.2942	0.453928	10.44	2
SO3072	gi|24349207	fabB	3-oxoacyl-(acyl-carrier-protein) synthase I			36.72	28
SO3070	gi|24374591	asd	aspartate semialdehyde dehydrogenase	2.12814	0.238095	42.9	16
SO3067	gi|24349199	folC	FolC bifunctional protein			5.104	2
SO3064	gi|24374586	purF	amidophosphoribosyltransferase	0.401791	0.257472	16.07	8
SO3052	gi|24374574		methyl-accepting chemotaxis protein	0.895365	0.897846	3.282	2
SO3044	gi|24349166	tnpA	ISSod4, transposase			5.5	2
SO3033	gi|24374558		ferric alcaligin siderophore receptor	5.29664	0.00138806	29.14	26
SO3032	gi|24374557		siderophore biosynthesis protein	5.54626	0.0206117	29.95	29
SO3030	gi|24374555	pubA	siderophore biosynthesis protein	3.63078	0.0114147	4.418	2
SO2934	gi|24374461		hypothetical protein SO2934	1.03753	0.949685	4.837	4
SO2929	gi|24374456		hypothetical protein SO2929	1.92309	0.220408	30.14	19
SO2916	gi|24349019	pta	phosphate acetyltransferase			6.974	4
SO2915	gi|38372229	ackA	Acetate kinase; Acetokinase	1.35519	0.685403	7.018	4
SO2912	gi|24374439	pflB	formate acetyltransferase	1.34276	0.14346	32.76	23
SO2907	gi|24374436		TonB-dependent receptor domain-containing protein	2.93765	0.00556063	39.71	37
SO2903	gi|24349005	cysK	cysteine synthase A			55.28	26
SO2896	gi|81460839	ligA	DNA ligase; Polydeoxyribonucleotide synthase [NAD(+)]	0.648634	0.476496	3.483	2
SO2882	gi|24374411	prkA	serine protein kinase	0.642688	0.419077	8.075	7
SO2881	gi|24348978	sodB	superoxide dismutase, Fe			46.39	12
SO2839	gi|24348928		hypothetical protein SO2839			15.17	2
SO2838	gi|24348927		ATP-dependent RNA helicase, DEAD box family			4.677	2
SO2834	gi|24374363	nrdD	anaerobic ribonucleoside triphosphate reductase	0.452898	0.313726	2.979	3
SO2832	gi|24348918		conserved hypothetical protein			19.49	2
SO2831	gi|31563134	ribA	GTP cyclohydrolase-2; GTP cyclohydrolase II	0.711214	0.604596	7.882	2
SO2817	gi|24348903	tnpA	ISSod4, transposase			5.5	2
SO2811	gi|24348899	tnpA	ISSod4, transposase			5.5	2
SO2791	gi|81461004	cdd	Cytidine deaminase; Cytidine aminohydrolase; CDA	0.816582	0.666656	8.108	2
SO2787	gi|24348871	cspA	cold shock domain family protein			73.91	8
SO2785	gi|24374321	rne	ribonuclease E	0.608135	0.429633	2.298	2
SO2778	gi|34098545	fabH	3-oxoacyl-[acyl-carrier-protein] synthase 3; 3-oxoacyl-[acyl-carrier-protein] synthase III; Beta-ketoacyl-ACP synthase III; KAS III	0.226986	0.0372373	19.44	9
SO2777	gi|24348862	fabD	malonyl CoA-acyl carrier protein transacylase			9.74	3
SO2776	gi|24374314	fabG	3-oxoacyl-ACP reductase	0.510505	0.0957175	40.32	18
SO2775	gi|38502823	acpP	Acyl carrier protein; ACP	0.824138	0.794534	28.57	2
SO2774	gi|24348856	fabF	3-oxoacyl-(acyl-carrier-protein) synthase II			2.427	2
SO2769	gi|24348851		conserved hypothetical protein			15.6	3
SO2768	gi|24348850		acyl-CoA dehydrogenase family protein			9.899	5
SO2760	gi|510120751	purM	Phosphoribosylformylglycinamidine cyclo-ligase; AIR synthase; AIRS; Phosphoribosyl-aminoimidazole synthetase	1.00925	0.980291	9.091	2
SO2753	gi|24374294		prolyl endopeptidase	1.6293	0.0617412	9.491	7
SO2748	gi|32699702	tolB	Protein TolB; Flags: Precursor	1.01859	0.9023	21.72	9
SO2747	gi|24348826	pal	peptidoglycan-associated lipoprotein			12.43	2
SO2743	gi|37077210	acsA	Acetyl-coenzyme A synthetase; Acetate--CoA ligase; Acyl-activating enzyme	2.51189	0.133384	21.54	16
SO2731	gi|32469724	opgG2	Glucans biosynthesis protein G 2; Flags: Precursor	0.111686	0.0453731	16.86	13
SO2731	gi|24348803	mdoG	periplasmic glucans biosynthesis protein MdoG			16.86	13
SO2730	gi|29839533	pepE	Peptidase E; Alpha-aspartyl dipeptidase; Asp-specific dipeptidase; Dipeptidase E	0.363078	0.567498	15.25	4
SO2723	gi|24374264	hinT	HIT family protein	0.83946	0.746451	21.19	2
SO2706	gi|81461110	astB	N-succinylarginine dihydrolase	0.717794	0.168558	10.14	4
SO2705	gi|24348771	topA	DNA topoisomerase I			3.645	2
SO2649	gi|24348703	cysB	cys regulon transcriptional activator			7.407	2
SO2644	gi|24374185	ppsA	phosphoenolpyruvate synthase	0.260615	0.000186491	38.66	55
SO2638	gi|24374179	ldh	leucine dehydrogenase	1.67494	0.11962	53.49	39
SO2636	gi|24348687		conserved hypothetical protein			2.632	2
SO2635	gi|24374176	purB	adenylosuccinate lyase	0.420727	0.00774305	20.39	14
SO2634	gi|34098546	hflD	High frequency lysogenization protein HflD homolog	0.972747	0.977149	7.317	2
SO2629	gi|24374171	icd	isocitrate dehydrogenase	0.990832	0.711875	39.81	35
SO2619	gi|68566007	metG	Methionine--tRNA ligase; Methionyl-tRNA synthetase; MetRS	1.38038	0.335331	10.5	7
SO2601	gi|24348647	prc	carboxyl-terminal protease			16.28	11
SO2600	gi|24348643	pepN	aminopeptidase N			3.298	4
SO2596	gi|24374139		hypothetical protein SO2596	1.61436	0.209371	18.06	9
SO2593	gi|24348632	gdh	conserved hypothetical protein			26.95	56
SO2592	gi|30173290	pyrD	Dihydroorotate dehydrogenase (quinone); DHOdehase; DHOD; DHODase; Dihydroorotate oxidase	0.937562	0.882488	4.72	2
SO2587	gi|24374130	hemB	delta-aminolevulinic acid dehydratase	0.912011	0.872735	9.009	2
SO2583	gi|24348619		hypothetical protein SO2583			24.07	5
SO2581	gi|24348617	fadD	long-chain-fatty-acid--CoA ligase			6.463	3
SO2577	gi|24374120	minD	septum site-determining protein MinD	1.47231	0.326055	10.78	2
SO2576	gi|50402212	minC	Probable septum site-determining protein MinC	0.954993	0.998844	12.22	2
SO2570	gi|24348603		lipoprotein, putative			6.757	3
SO2567	gi|37088843		Putative regulator of ribonuclease activity	0.870964	0.819293	6.098	2
SO2566	gi|24374109	asmA	asmA protein	0.731139	0.359692	7.921	5
SO2530	gi|32363156	def3	Peptide deformylase 3; PDF 3; Polypeptide deformylase 3	0.946237	0.811484	15.95	2
SO2510	gi|24348529	rnfC	iron-sulfur cluster-binding protein			3.418	2
SO2503	gi|81461394	queC	7-cyano-7-deazaguanine synthase; 7-cyano-7-carbaguanine synthase; PreQ(0) synthase; Queuosine biosynthesis protein QueC	0.801678	0.684371	10.92	2
SO2492	gi|24374036	fadE1	acyl-CoA dehydrogenase	1.55597	0.319518	2.899	2
SO2491	gi|24374035	pykA	pyruvate kinase II	0.253513	0.0150909	20.67	9
SO2490	gi|24374034	hexR	DNA-binding transcriptional regulator HexR	0.47863	0.197481	6.69	2
SO2489	gi|24374033	zwf	glucose-6-phosphate 1-dehydrogenase	1.19124	0.653643	8.367	6
SO2488	gi|24374032	pgl	6-phosphogluconolactonase	0.630957	0.452621	12.07	2
SO2487	gi|24348501	edd	6-phosphogluconate dehydratase			13.16	7
SO2485	gi|32171466		Deoxyguanosinetriphosphate triphosphohydrolase-like protein	0.912011	0.870261	6.576	2
SO2483	gi|24348497	yfbQ	aspartate aminotransferase, putative			13.37	4
SO2478	gi|81589203	kdsB	3-deoxy-manno-octulosonate cytidylyltransferase; CMP-2-keto-3-deoxyoctulosonic acid synthase; CKS; CMP-KDO synthase	1.10662	0.757955	8.163	2
SO2477	gi|24374021		alcohol dehydrogenase	0.691831	0.489088	36.8	20
SO2476	gi|24348487		polysaccharide biosynthesis protein			24.3	14
SO2433	gi|38372526	aspS	Aspartate--tRNA ligase; Aspartyl-tRNA synthetase; AspRS	1.04713	0.642746	27.07	19
SO2427	gi|24373974		TonB-dependent receptor	1.39316	0.594872	12.08	8
SO2416	gi|24348405	nrdB	ribonucleoside-diphosphate reductase, beta subunit			6.383	2
SO2415	gi|24373962	nrdA	ribonucleotide-diphosphate reductase subunit alpha	0.928966	0.857592	6.955	5
SO2413	gi|39932530	ubiG	3-demethylubiquinone-9 3-methyltransferase; 2-polyprenyl-6-hydroxyphenyl methylase; 3,4-dihydroxy-5-hexaprenylbenzoate methyltransferase; DHHB methyltransferase			12.29	2
SO2411	gi|24373958	gyrA	DNA gyrase subunit A	0.301995	0.365633	10.88	11
SO2410	gi|510120731	serC	Phosphoserine aminotransferase; Phosphohydroxythreonine aminotransferase; PSAT	1.03753	0.845473	11.72	4
SO2406	gi|24348391	aspC	aspartate aminotransferase			22.22	10
SO2403	gi|59798085	cmk	Cytidylate kinase; CK; Cytidine monophosphate kinase; CMP kinase	0.847227	0.453345	10.87	5
SO2402	gi|24348384	rpsA	ribosomal protein S1			44.86	49
SO2398	gi|31076966	pyrF	Orotidine 5'-phosphate decarboxylase; OMP decarboxylase; OMPDCase; OMPdecase	0.937562	0.759004	12.99	3
SO2397	gi|24348379		oxidoreductase, short-chain dehydrogenase/reductase family			17.45	3
SO2395	gi|24348377	acdS	acyl-CoA dehydrogenase family protein			9.573	5
SO2392	gi|24348374	tnpA	ISSod4, transposase			5.5	2
SO2364	gi|24373911	ccoN	cbb3-type cytochrome c oxidase subunit I	1.47231	0.477168	2.092	2
SO2355	gi|24373902	uspE	universal stress protein UspE	0.666807	0.631267	9.677	6
SO2350	gi|24348319	aspC	aspartate aminotransferase			30.23	11
SO2347	gi|24373894	gapB	glyceraldehyde-3-phosphate dehydrogenase	1.18032	0.958138	37.53	25
SO2345	gi|24373892	gapA	glyceraldehyde 3-phosphate dehydrogenase	0.47863	0.147225	39.88	21
SO2344	gi|24348310	tnpA	ISSod4, transposase			5.5	2
SO2341	gi|24373888	bkdB	dihydrolipoamide acetyltransferase	1.14815	0.915005	5.234	3
SO2340	gi|24348306	bkdA2	alpha keto acid dehydrogenase complex, E1 component, beta subunit			18.77	7
SO2339	gi|24348305	bkdA1	alpha keto acid dehydrogenase complex, E1 component, alpha subunit			22.19	9
SO2338	gi|46576582	astE	Succinylglutamate desuccinylase	0.672977	0.431907	13.66	5
SO2336	gi|24373883	pgm	phosphoglucomutase	1.27057	0.464318	14.73	9
SO2335	gi|81461598	seqA	Negative modulator of initiation of replication	0.772681	0.638225	6.557	2
SO2330	gi|24373877	fldA	flavodoxin FldA	1.10662	0.793131	21.71	3
SO2328	gi|31563046	efp	Elongation factor P; EF-P	1	0.981751	38.71	6
SO2310	gi|30173158	serS	Serine--tRNA ligase; Seryl-tRNA synthetase; SerRS; Seryl-tRNA(Ser/Sec) synthetase	0.937562	0.612595	14.95	5
SO2305	gi|24373857	lrp	leucine-responsive transcriptional regulator	0.363078	0.232389	11.31	3
SO2303	gi|24348263	trxB	thioredoxin reductase			35.96	9
SO2302	gi|31563135	rplT	50S ribosomal protein L20	1.24738	0.51945	29.66	7
SO2300	gi|29427470	infC	Translation initiation factor IF-3	1.14815	0.773801	15.17	3
SO2299	gi|73919825	thrS	Threonine--tRNA ligase; Threonyl-tRNA synthetase; ThrRS	0.963829	0.641717	13.24	8
SO2274	gi|38372280	ndk	Nucleoside diphosphate kinase; NDK; NDP kinase; Nucleoside-2-P kinase	0.57544	0.146556	67.13	24
SO2272	gi|24348223	tnpA	ISSod4, transposase			5.5	2
SO2270	gi|81589226	rimK2	Ribosomal protein S6 modification protein 2	1.75388	0.383681	9.365	2
SO2268	gi|33112319	hscA	Chaperone protein HscA homolog	0.954993	0.538684	15	7
SO2264	gi|81744778	iscS	Cysteine desulfurase	1	0.908294	25.99	12
SO2262	gi|24373815	cysE	serine acetyltransferase	0.60256	0.42171	6.96	2
SO2260	gi|24348211	suhB	extragenic suppressor protein SuhB			51.31	13
SO2250	gi|47605886	nagZ	Beta-hexosaminidase; Beta-N-acetylhexosaminidase; N-acetyl-beta-glucosaminidase	1.14815	0.734991	11.11	4
SO2250	gi|24348195	nagZ	beta-hexosaminidase			11.11	4
SO2248	gi|24348193	sdaA	L-serine dehydratase 1			5.677	2
SO2240	gi|24348185		methyl-accepting chemotaxis protein			4.771	2
SO2223	gi|24348163		peptidase, putative			6.55	4
SO2222	gi|24348162	fumB	fumarate hydratase, class I, anaerobic, putative			12.21	6
SO2218	gi|38258372	asnS	Asparagine--tRNA ligase; Asparaginyl-tRNA synthetase; AsnRS	1.00925	0.822499	21.89	10
SO2198	gi|24373753		aminopeptidase	0.597035	0.161135	8.893	3
SO2178	gi|24373735	ccpA	cytochrome c551 peroxidase	0.334195	0.218728	6.306	2
SO2107	gi|32469725	opgG1	Glucans biosynthesis protein G 1; Flags: Precursor	1.20226	0.712594	9.559	3
SO2098	gi|24373658	hyaB	quinone-reactive Ni/Fe hydrogenase, large subunit	1.13763	0.835793	8.818	7
SO2086	gi|30316224	pheT	Phenylalanine--tRNA ligase beta subunit; Phenylalanyl-tRNA synthetase beta subunit; PheRS	1.01859	0.744383	13.33	13
SO2085	gi|41018355	pheS	Phenylalanine--tRNA ligase alpha subunit; Phenylalanyl-tRNA synthetase alpha subunit; PheRS	0.928966	0.60412	11.31	4
SO2054	gi|24347949	frmA	alcohol dehydrogenase class III			8.971	4
SO2047	gi|24347938		prolyl oligopeptidase family protein			3.73	2
SO2046	gi|24347937		transcriptional regulator, MarR family			5.882	2
SO2018	gi|29427471	adk	Adenylate kinase; AK; ATP-AMP transphosphorylase	0.564937	0.77704	37.85	6
SO2016	gi|47115813	htpG	Chaperone protein HtpG; Heat shock protein HtpG; High temperature protein G	0.319154	8.18577e-08	52.43	57
SO2012	gi|32171326	apt	Adenine phosphoribosyltransferase; APRT	0.990832	0.807352	11.6	3
SO2001	gi|24373565	ushA	bifunctional UDP-sugar hydrolase/5'-nucleotidase periplasmic	0.291072	0.00123116	26.01	18
SO1971	gi|24347847		AMP-binding family protein			4.498	3
SO1962	gi|24373526	hppD	4-hydroxyphenylpyruvate dioxygenase	0.946237	0.809927	13.58	5
SO1949	gi|24347819		invasin domain protein			3.153	4
SO1937	gi|24373501	fur	ferric uptake regulator	0.744732	0.585908	23.08	2
SO1933	gi|24373497	sucD	succinyl-CoA synthase subunit alpha	0.928966	0.677876	27.93	14
SO1932	gi|77417484	sucC	Succinyl-CoA ligase [ADP-forming] subunit beta; Succinyl-CoA synthetase subunit beta; SCS-beta	0.972747	0.736071	40.21	30
SO1931	gi|24373495	sucB	2-oxoglutarate dehydrogenase, E2 component, dihydrolipoamide succinyltransferase	1.18032	0.479894	15.44	7
SO1930	gi|24373494	sucA	2-oxoglutarate dehydrogenase E1	0.794328	0.887916	11.82	13
SO1929	gi|24347793	sdhB	succinate dehydrogenase, iron-sulfur protein			22.55	6
SO1928	gi|24373492	sdhA	succinate dehydrogenase flavoprotein subunit	1.0666	0.749995	20.92	13
SO1926	gi|24347790	gltA	citrate synthase			26.64	24
SO1898	gi|24347754	liuR	transcriptional regulator, putative			11.94	2
SO1897	gi|24347753	liuA	isovaleryl-CoA dehydrogenase			21.85	9
SO1896	gi|24373461	liuB	3-methylcrotonyl CoA carboxylase subunit beta	0.505825	0.520842	6.729	3
SO1895	gi|24347748	liuC	enoyl-CoA hydratase/isomerase family protein			13.54	5
SO1894	gi|24373459	liuD	acetyl-CoA carboxylase, biotin carboxylase	1.23595	0.774624	16.14	8
SO1893	gi|24347746	liuE	hydroxymethylglutaryl-CoA lyase			10.16	4
SO1891	gi|24347744	liuG	3-oxoadipate CoA-succinyl transferase, beta subunit			20.18	5
SO1880	gi|81462169	bamC	Outer membrane protein assembly factor BamC; Flags: Precursor	1.23595	0.473288	8.767	3
SO1875	gi|24347724	tnpA	ISSod4, transposase			5.5	2
SO1870	gi|48474856	speA	Biosynthetic arginine decarboxylase; ADC	1	0.788068	11.77	7
SO1862	gi|24373250	ivdF	3-hydroxyisobutyrate dehydrogenase	1.59956	0.618332	24.67	10
SO1856	gi|46395861	fabA	3-hydroxydecanoyl-[acyl-carrier-protein] dehydratase; Beta-hydroxydecanoyl thioester dehydrase	0.554626	0.105418	25.15	8
SO1831	gi|24373396		hypothetical protein SO1831	3.01995	0.0528457	9.031	5
SO1829	gi|24373394		hypothetical protein SO1829	1.48594	0.068295	34.46	23
SO1825	gi|24373390	ttpC	MotA/TolQ/ExbB proton channel family protein	2.91072	0.00281785	43.46	32
SO1824	gi|24373389		hypothetical protein SO1824	3.22107	0.131018	38.46	11
SO1816	gi|50403664		UPF0319 protein SO1816; Flags: Precursor	1.23595	0.689603	11.95	3
SO1807	gi|24373372	pspA	phage shock protein A	0.246604	0.0952208	17.62	3
SO1800	gi|62288000	fabV	Putative reductase SO1800	0.630957	0.477389	17	6
SO1798	gi|24373364	ppiD	peptidyl-prolyl cis-trans isomerase D	2.07014	0.170073	32.21	23
SO1797	gi|24373363	hupB	HU family DNA-binding protein	0.580764	0.33167	30	5
SO1796	gi|24347625	lon	ATP-dependent protease La			14.52	12
SO1793	gi|41018226	tig	Trigger factor; TF; PPIase	0.469894	0.000299515	59.68	46
SO1792	gi|81462266	folD	Bifunctional protein FolD; Includes: Methylenetetrahydrofolate dehydrogenase; Includes: Methenyltetrahydrofolate cyclohydrolase	0.831764	0.930315	9.859	3
SO1791	gi|30316159	cysS	Cysteine--tRNA ligase; Cysteinyl-tRNA synthetase; CysRS			9.368	4
SO1790	gi|24347616	ppiB	peptidyl-prolyl cis-trans isomerase B			32.32	5
SO1786	gi|46577264	glnS	Glutamine--tRNA ligase; Glutaminyl-tRNA synthetase; GlnRS	0.887156	0.820457	14.57	8
SO1779	gi|24373345	omcA	decaheme cytochrome c	0.359749	0.881516	5.442	5
SO1767	gi|24347584	tnpA	ISSod4, transposase			5.5	2
SO1763	gi|24347580	satA	streptogramin A acetyl transferase			13.33	3
SO1755	gi|24373322		phosphoglucomutase/phosphomannomutase	5.01187	0.0005479	26.7	13
SO1750	gi|24347564		ABC transporter, ATP-binding protein			18.15	4
SO1690	gi|24373258	ybiT	ABC transporter ATP-binding protein	0.816582	0.715258	3.962	3
SO1683	gi|24373251	ivdG	3-ketoacyl-ACP reductase	0.758578	0.997673	26.59	10
SO1682	gi|24347484	ivdF	3-hydroxyisobutyrate dehydrogenase			24.67	10
SO1681	gi|24347483	ivdE	enoyl-CoA hydratase/isomerase family protein			26.11	14
SO1680	gi|24373248	ivdD	enoyl-CoA hydratase	1.07647	0.983388	21.4	5
SO1679	gi|24373247	ivdC	acyl-CoA dehydrogenase	1.83654	0.177105	31.17	21
SO1678	gi|24373246	ivdB	methylmalonate-semialdehyde dehydrogenase	2.63027	0.0819453	27.45	25
SO1677	gi|24373245	ivdA	acetyl-CoA acetyltransferase	2.03236	0.0373618	41.41	30
SO1675	gi|24347474		conserved hypothetical protein			8	2
SO1670	gi|24373238	fahA	fumarylacetoacetate hydrolase	0.92045	0.825236	22.56	7
SO1667	gi|47605960		Putative pterin-4-alpha-carbinolamine dehydratase; PHS; 4-alpha-hydroxy-tetrahydropterin dehydratase; Pterin carbinolamine dehydratase; PCD	2.12814	0.292772	27.68	3
SO1666	gi|24373234	phhA	phenylalanine 4-monooxygenase	1.41906	0.0381341	7.011	2
SO1665	gi|24347462	galU	UTP-glucose-1-phosphate uridylyltransferase			24.5	9
SO1648	gi|24347442		cold shock domain family protein	1.45881	0.504289	22.22	2
SO1641	gi|24347430	lpxA	acyl-(acyl-carrier-protein)--UDP-N-acetylglucosamine O-acyltransferase			11.72	3
SO1640	gi|33516896	fabZ	(3R)-hydroxymyristoyl-[acyl-carrier-protein] dehydratase; (3R)-hydroxymyristoyl ACP dehydrase	1.05682	0.779563	17.53	2
SO1637	gi|24347426	bamA	bacterial surface antigen			7.869	5
SO1632	gi|34924965	frr	Ribosome-recycling factor; RRF; Ribosome-releasing factor	0.809096	0.509404	42.7	9
SO1630	gi|29427749	tsf	Elongation factor Ts; EF-Ts	0.630957	0.256808	60.78	32
SO1629	gi|38258373	rpsB	30S ribosomal protein S2	1.28233	0.491912	27.27	10
SO1627	gi|24347416	map	methionine aminopeptidase, type I			20	4
SO1625	gi|71153311	dapD	2,3,4,5-tetrahydropyridine-2,6-dicarboxylate N-succinyltransferase; Tetrahydrodipicolinate N-succinyltransferase; THDP succinyltransferase; THP succinyltransferase; Tetrahydropicolinate succinylase	0.903649	0.967553	14.23	3
SO1616	gi|24347403	tnpA	ISSod4, transposase			5.5	2
SO1608	gi|82581549	queF	NADPH-dependent 7-cyano-7-deazaguanine reductase; 7-cyano-7-carbaguanine reductase; NADPH-dependent nitrile oxidoreductase; PreQ(0) reductase	0.912011	0.874118	10.84	3
SO1606	gi|24373175		metallo-beta-lactamase superfamily protein	1.43219	0.522259	5.279	3
SO1579	gi|24373149		hypothetical protein SO1579	9.12011	0.358832	6.383	2
SO1576	gi|24373146	yfcG	glutathione S-transferase	0.903649	0.798573	21.62	8
SO1575	gi|24347347		NOL1/NOP2/sun family putative RNA methylase			5.144	2
SO1571	gi|24373141		hypothetical protein SO1571	1.51356	0.217941	8.069	7
SO1560	gi|24373130	pstS	phosphate-binding protein	1	0.930204	15.17	4
SO1556	gi|30173291	rdgC	Recombination-associated protein RdgC	1.14815	0.0946448	13.16	4
SO1551	gi|24373122		diguanylate cyclase	0.847227	0.377131	7.143	4
SO1550	gi|24347317		conserved hypothetical protein			11.09	6
SO1538	gi|24373111		isocitrate dehydrogenase	1.22462	0.392031	27.76	13
SO1524	gi|52782945	grpE	Protein GrpE; HSP-70 cofactor	0.928966	0.978572	16.02	4
SO1521	gi|24373095	dld	(Fe-S)-binding protein	0.47863	0.0188194	16.63	17
SO1490	gi|24373064	adhB	alcohol dehydrogenase	0.152757	8.35473e-05	68.59	80
SO1484	gi|24373058	aceA	isocitrate lyase	1.6293	0.307124	14.55	6
SO1483	gi|24347233	aceB	malate synthase A			4.554	2
SO1460	gi|24347206	hsdS	type I restriction-modification system, S subunit, putative			6.951	2
SO1429	gi|24347166	dmsA	anaerobic dimethyl sulfoxide reductase, A subunit			2.871	2
SO1405	gi|24347135		transglutaminase family protein			9.499	2
SO1388	gi|24372966	ampP	aminopeptidase	1.33045	0.432851	22.8	15
SO1383	gi|24347107		ATP-dependent RNA helicase, DEAD box family			3.926	2
SO1368	gi|29336678	pepA2	Probable cytosol aminopeptidase 2; Leucine aminopeptidase 2; LAP 2; Leucyl aminopeptidase 2	1.19124	0.489083	9.761	5
SO1360	gi|39931974	rplS	50S ribosomal protein L19	0.903649	0.870134	30.77	8
SO1356	gi|24347070	ffh	signal recognition particle protein Ffh			11.38	5
SO1351	gi|30316032	pdxJ	Pyridoxine 5'-phosphate synthase; PNP synthase	1.14815	0.588753	15.51	5
SO1348	gi|81462673	rnc	Ribonuclease 3; Ribonuclease III; RNase III	0.903649	0.821527	10.18	3
SO1346	gi|33112372	lepA	Elongation factor 4; EF-4; Ribosomal back-translocase LepA	0.855067	0.656534	9.396	4
SO1341	gi|24372919	nadB	L-aspartate oxidase	2.44343	0.294478	5.959	3
SO1335	gi|32171834	thyA	Thymidylate synthase; TS; TSase	0.369828	0.64079	11.36	3
SO1327	gi|24347034	hptA	sensor histidine kinase-related protein			23.14	2
SO1315	gi|81462720	tyrS	Tyrosine--tRNA ligase; Tyrosyl-tRNA synthetase; TyrRS	1.07647	0.937921	25.13	11
SO1301	gi|24346996	pyrB	aspartate carbamoyltransferase			7.375	3
SO1300	gi|32171389	hemL	Glutamate-1-semialdehyde 2,1-aminomutase; GSA; Glutamate-1-semialdehyde aminotransferase; GSA-AT			28.84	14
SO1295	gi|24346990	lpp	major outer membrane lipoprotein, putative			26.14	2
SO1291	gi|24346986	folB	dihydroneopterin aldolase			22.41	3
SO1284	gi|24346976	rpoD	RNA polymerase sigma-70 factor			9.74	6
SO1276	gi|24372857	puuE	4-aminobutyrate aminotransferase	1.1695	0.833192	14.59	9
SO1270	gi|24346959	potF	polyamine ABC transporter, periplasmic polyamine-binding protein			24.52	7
SO1269	gi|24346955	tnpA	ISSod4, transposase			5.5	2
SO1227	gi|24346902		conserved hypothetical protein			10.77	2
SO1221	gi|81589347	deoD2	Purine nucleoside phosphorylase DeoD-type 2; PNP 2	0.636796	0.463485	43.22	24
SO1219	gi|38604870	deoB	Phosphopentomutase; Phosphodeoxyribomutase	0.564937	0.309395	8.416	3
SO1218	gi|81462852	deoA	Thymidine phosphorylase; TdRPase	0.387258	0.00870385	27.77	15
SO1217	gi|39931142	deoC	Deoxyribose-phosphate aldolase; DERA; 2-deoxy-D-ribose 5-phosphate aldolase; Phosphodeoxyriboaldolase; Deoxyriboaldolase	0.809096	0.758262	41.41	13
SO1215	gi|24346884	ompK	outer membrane protein OmpK, putative			10.6	4
SO1210	gi|24346880		TPR domain protein	3.31131	0.199878	5.319	2
SO1209	gi|187611309	pnp	Polyribonucleotide nucleotidyltransferase; Polynucleotide phosphorylase; PNPase	1.5417	0.133139	31.47	39
SO1207	gi|81744849	rpsO	30S ribosomal protein S15	1.94089	0.222444	38.2	2
SO1205	gi|29427753	rbfA	Ribosome-binding factor A	0.879022	0.684025	17.69	3
SO1204	gi|39931287	infB	Translation initiation factor IF-2	0.515229	0.0589808	22.82	22
SO1203	gi|24346871	nusA	N utilization substance protein A			14.03	5
SO1202	gi|34222878	rimP	Ribosome maturation factor RimP	0.912011	0.86282	14.57	2
SO1200	gi|39932407	tpiA	Triosephosphate isomerase; TIM; Triose-phosphate isomerase	0.496592	0.172405	22.31	6
SO1198	gi|24372781	folP	dihydropteroate synthase	2.10863	0.461022	7.581	3
SO1196	gi|81462880	rlmE	Ribosomal RNA large subunit methyltransferase E; 23S rRNA Um2552 methyltransferase; rRNA (uridine-2'-O-)-methyltransferase	0.765597	0.521058	3.828	2
SO1195	gi|24346859	yhbY	conserved hypothetical protein TIGR00253			9.091	2
SO1190	gi|24372773		hypothetical protein SO1190	1.90546	0.331592	26.84	7
SO1185	gi|24346846	ychF	conserved hypothetical protein TIGR00092			32.78	13
SO1181	gi|81446317	miaB	(Dimethylallyl)adenosine tRNA methylthiotransferase MiaB; tRNA-i(6)A37 methylthiotransferase	0.586138	0.200793	7.173	3
SO1180	gi|24372763	ybeZ	PhoH family protein	1.38038	0.551773	6.761	2
SO1174	gi|32171553	leuS	Leucine--tRNA ligase; Leucyl-tRNA synthetase; LeuRS	0.981748	0.908311	8.149	6
SO1164	gi|24372747	dacA-1	D-alanyl-D-alanine carboxypeptidase	2.12814	0.195116	17.44	8
SO1163	gi|32171836		UPF0250 protein SO1163	0.505825	0.33457	32.95	3
SO1161	gi|47117232	lipA	Lipoyl synthase; Lip-syn; LS; Lipoate synthase; Lipoic acid synthase; Sulfur insertion protein LipA	0.963829	0.888953	6.231	2
SO1150	gi|30173293	rpiA	Ribose-5-phosphate isomerase A; Phosphoriboisomerase A; PRI	0.787046	0.310776	24.66	5
SO1145	gi|24346794		magnesium transporter			7.002	3
SO1144	gi|24372727		methyl-accepting chemotaxis protein	0.448745	0.157829	8.287	3
SO1142	gi|24372725	carB	carbamoyl phosphate synthase large subunit	0.666807	0.215505	14.9	15
SO1141	gi|31563000	carA	Carbamoyl-phosphate synthase small chain; Carbamoyl-phosphate synthetase glutamine chain	0.855067	0.927409	16.84	7
SO1140	gi|39931143	dapB	Dihydrodipicolinate reductase; DHPR	1.21339	0.694312	12.59	2
SO1127	gi|62900015	dnaJ	Chaperone protein DnaJ	0.299226	0.078462	19.05	7
SO1126	gi|33112277	dnaK	Chaperone protein DnaK; HSP70; Heat shock 70 kDa protein; Heat shock protein 70	0.277971	0.000683349	41	34
SO1122	gi|39931975	proA	Gamma-glutamyl phosphate reductase; GPR; Glutamate-5-semialdehyde dehydrogenase; Glutamyl-gamma-semialdehyde dehydrogenase; GSA dehydrogenase	1.24738	0.440593	8	5
SO1117	gi|24372700		cytosol aminopeptidase	1.67494	0.624703	7.157	4
SO1115	gi|24346756	pepD	aminoacyl-histidine dipeptidase			4.321	3
SO1112	gi|24372696	brf1	bacterioferritin subunit 1	0.751623	0.431358	23.87	3
SO1108	gi|24372692	nqrF	Na(+)-translocating NADH-quinone reductase subunit F	1.75388	0.460638	13.4	6
SO1105	gi|24372689	nqrC	Na(+)-translocating NADH-quinone reductase subunit C	1.35519	0.566167	15.65	5
SO1103	gi|24372687	nqrA	Na(+)-translocating NADH-quinone reductase subunit A	2.18776	0.291978	32.66	15
SO1101	gi|30173052	luxS	S-ribosylhomocysteine lyase; AI-2 synthesis protein; Autoinducer-2 production protein LuxS	0.990832	0.887755	16.57	3
SO1095	gi|24346731	metY	O-acetylhomoserine (thiol)-lyase, putative			5.581	2
SO1075	gi|24372660		hypothetical protein SO1075	1.64437	0.00814446	34.68	30
SO1065	gi|24372650	fklB	FKBP-type peptidylprolyl isomerase	2.10863	0.370674	12.55	3
SO1060	gi|24346685		conserved hypothetical protein			43.15	7
SO1051	gi|32469726	opgD	Probable glucans biosynthesis protein D; Flags: Precursor			13.33	6
SO1051	gi|24372637	mdoD	glucan biosynthesis protein D	3.16228	0.216777	12.06	6
SO1026	gi|24346641	tnpA	ISSod4, transposase			5.5	2
SO1020	gi|81589369	nuoB	NADH-quinone oxidoreductase subunit B; NADH dehydrogenase I subunit B; NDH-1 subunit B	1.33045	0.576197	4.018	2
SO1019	gi|81589370	nuoC	NADH-quinone oxidoreductase subunit C/D; NADH dehydrogenase I subunit C/D; NDH-1 subunit C/D	1.23595	0.15068	6.323	4
SO1017	gi|24372603	nuoF	NADH dehydrogenase I subunit F	0.879022	0.805163	3.905	2
SO1016	gi|38604871	nuoG	NADH-quinone oxidoreductase subunit G; NADH dehydrogenase I subunit G; NDH-1 subunit G	1.36773	0.730443	8.361	6
SO0994	gi|24372580		hypothetical protein SO0994	1.64437	0.418235	32.88	6
SO0992	gi|39932202	lysS	Lysine--tRNA ligase; Lysyl-tRNA synthetase; LysRS	0.912011	0.558197	20.8	14
SO0987	gi|24372574		methyl-accepting chemotaxis protein	0.903649	0.831467	3.61	3
SO0970	gi|25452947		Fumarate reductase flavoprotein subunit; Flavocytochrome c; FL cyt; Flags: Precursor	0.263027	4.45087e-07	47.15	46
SO0968	gi|24346570	ldhA	D-lactate dehydrogenase			6.383	2
SO0947	gi|24346546	srmB	ATP-dependent RNA helicase SrmB			9.524	3
SO0933	gi|24372520	fba	fructose-1,6-bisphosphate aldolase	0.903649	0.844276	37.46	25
SO0932	gi|30172998	pgk	Phosphoglycerate kinase	0.685488	0.235713	47.83	28
SO0930	gi|24346522	tkt	transketolase			27.71	22
SO0929	gi|29611811	metK	S-adenosylmethionine synthase; AdoMet synthase; MAT; Methionine adenosyltransferase	0.801678	0.663208	7.05	3
SO0907	gi|24346492	nqrF	NADH:ubiquinone oxidoreductase, Na translocating, beta subunit			8.642	3
SO0888	gi|24346470	aguB	amidase family protein			7.218	4
SO0887	gi|73622173	aguA	Putative agmatine deiminase; Agmatine iminohydrolase	1	0.526804	12.97	6
SO0876	gi|24372465	pepB	aminopeptidase	2.67917	0.0909889	18.84	9
SO0869	gi|30173054	panC	Pantothenate synthetase; PS; Pantoate--beta-alanine ligase; Pantoate-activating enzyme	0.619441	0.441915	10.32	2
SO0862	gi|24346434	serA	D-3-phosphoglycerate dehydrogenase			14.91	5
SO0861	gi|24346433	ygfZ	conserved hypothetical protein			14.47	4
SO0848	gi|81463307	napA	Periplasmic nitrate reductase; Flags: Precursor	0.328095	0.422826	9.08	6
SO0842	gi|34395660	fusB	Elongation factor G 2; EF-G 2	0.772681	0.31016	43.9	59
SO0840	gi|24372429	accADCB	acetyl-CoA carboxylase multifunctional carboxyl transferase subunit alpha/carboxyl transferase subunit beta/biotin carboxylase	0.772681	0.451761	13.45	19
SO0832	gi|24372421	rsmE	16S ribosomal RNA methyltransferase RsmE	1.1272	0.850921	6.584	2
SO0831	gi|29611762	gshB	Glutathione synthetase; GSH synthetase; GSH-S; GSHase; Glutathione synthase			8.571	2
SO0830	gi|24346388	phoA	alkaline phosphatase			4.626	2
SO0807	gi|24346359		hypoxanthine-guanine phosphoribosyltransferase			31.38	3
SO0795	gi|24346344	ycaO	conserved hypothetical protein			7.264	4
SO0783	gi|24346329		hypothetical protein SO0783			8.006	4
SO0781	gi|34921759	gcvP	Glycine dehydrogenase [decarboxylating]; Glycine cleavage system P-protein; Glycine decarboxylase	1.03753	0.719811	25.99	28
SO0779	gi|31340142	gcvT	Aminomethyltransferase; Glycine cleavage system T protein	1.0666	0.619303	4.121	6
SO0778	gi|24372367	visC	FAD-binding, UbiH/Coq6 family oxidoreductase	2.53513	0.252219	3.44	2
SO0770	gi|25108898	mdh	Malate dehydrogenase	1.04713	0.744031	68.81	59
SO0764	gi|24346304		hypothetical protein SO0764			17.47	4
SO0762	gi|24372351		isochorismatase	0.963829	0.923576	11.67	2
SO0756	gi|24372345	aroG	phospho-2-dehydro-3-deoxyheptonate aldolase	0.630957	0.44972	7.386	2
SO0744	gi|24372333	fbpA	iron(III) ABC transporter periplasmic iron(III)-binding protein	0.30479	0.0420217	11.04	3
SO0704	gi|29839303	groL	60 kDa chaperonin; GroEL protein; Protein Cpn60	0.580764	0.0556047	68.44	92
SO0703	gi|29839304	groS	10 kDa chaperonin; GroES protein; Protein Cpn10	0.356451	0.219726	25	4
SO0655	gi|24372246		hypothetical protein SO0655	0.679204	0.669945	14.08	3
SO0624	gi|24346130	crp	catabolite gene activator			51.66	10
SO0620	gi|24372211		hypothetical protein SO0620	0.787046	0.665668	22.85	5
SO0620	gi|24346212		hypothetical protein SO0691			37.31	5
SO0619	gi|24346125	astD	succinylglutamic semialdehyde dehydrogenase			16.22	7
SO0618	gi|24346124	astA	arginine N-succinyltransferase			3.54	2
SO0617	gi|28376895	argD	Acetylornithine aminotransferase; ACOAT	0.613762	0.997459	46.67	21
SO0611	gi|24372202	sspA	stringent starvation protein A	1.19124	0.63356	31.1	10
SO0606	gi|24372197	hflC	hflC protein	1.38038	0.470336	19.87	6
SO0605	gi|24372196	hflK	hflK protein	1.51356	0.483152	8.136	2
SO0603	gi|61213153	hfq	Protein hfq			14.44	3
SO0602	gi|46577042	miaA	tRNA dimethylallyltransferase; Dimethylallyl diphosphate:tRNA dimethylallyltransferase; DMAPP:tRNA dimethylallyltransferase; DMATase; Isopentenyl-diphosphate:tRNA isopentenyltransferase; IPP transferase; IPPT; IPTase	0.666807	0.440503	8.766	3
SO0596	gi|24346093	tnpA	ISSod4, transposase			5.5	2
SO0595	gi|24372186		hypothetical protein SO0595	0.226986	0.00576604	18.58	4
SO0591	gi|38257601	rsgA	Putative ribosome biogenesis GTPase RsgA	0.903649	0.855653	11.02	3
SO0578	gi|24346074		hypothetical protein SO0578			5.875	3
SO0575	gi|41017732	rapA	RNA polymerase-associated protein RapA; ATP-dependent helicase HepA	0.879022	0.885483	2.169	2
SO0568	gi|24346059	rraB	conserved hypothetical protein			36.57	4
SO0560	gi|81463663	fhs	Formate--tetrahydrofolate ligase; Formyltetrahydrofolate synthetase; FHS; FTHFS	0.564937	0.385779	5.263	2
SO0519	gi|81589407	astD	N-succinylglutamate 5-semialdehyde dehydrogenase; Succinylglutamic semialdehyde dehydrogenase; SGSD	0.946237	0.835982	16.22	7
SO0518	gi|24346000		outer membrane efflux family protein, putative			6.416	2
SO0456	gi|24345926		immunogenic-related protein			25.79	8
SO0442	gi|32171650	purH	Bifunctional purine biosynthesis protein PurH; Includes: Phosphoribosylaminoimidazolecarboxamide formyltransferase; AICAR transformylase; Includes: IMP cyclohydrolase; ATIC; IMP synthase; Inosinicase	0.376704	0.042387	20.07	10
SO0441	gi|24372036	purD	phosphoribosylamine--glycine ligase	0.487529	0.562056	19.91	8
SO0435	gi|29611763	hemE	Uroporphyrinogen decarboxylase; UPD; URO-D	0.580764	0.308434	18.64	5
SO0432	gi|24372027	acnB	bifunctional aconitate hydratase 2/2-methylisocitrate dehydratase	0.299226	2.29991e-05	42.66	63
SO0429	gi|24345891	pepO	peptidase, M13 family			19.26	13
SO0426	gi|24372021	lpdA	dihydrolipoamide dehydrogenase	0.809096	0.429582	47.58	42
SO0424	gi|24345883	aceE	pyruvate dehydrogenase complex, E1 component, pyruvate dehydrogenase			16.44	17
SO0410	gi|24372006	mutT	mutator mutT protein	0.758578	0.677075	10	2
SO0409	gi|24372005		hypothetical protein SO0409	0.731139	0.151787	15.73	3
SO0406	gi|24345863	trxA	thioredoxin 1			28.7	2
SO0405	gi|24372001	rho	transcription termination factor Rho	0.608135	0.111011	19.71	11
SO0404	gi|24372000		hypothetical protein SO0404	1.36773	0.621329	3.299	3
SO0401	gi|24371997		alcohol dehydrogenase	0.248886	0.175224	10.98	4
SO0378	gi|24345826	tnpA	ISSod4, transposase			5.5	2
SO0355	gi|24371953		AMP-binding protein	0.787046	0.566907	5.054	2
SO0345	gi|24371943	prpB	2-methylisocitrate lyase	1.44544	0.473816	15.41	4
SO0344	gi|24371942	prpC	methylcitrate synthase	1.88799	0.0774482	30.4	12
SO0343	gi|24345782	acnD	aconitate hydratase 1			7.958	10
SO0342	gi|24345781	prpF	conserved hypothetical protein			13.6	4
SO0340	gi|24345776	ilvE	branched-chain amino acid aminotransferase			8.54	3
SO0333	gi|24345769	dsbA	thiol:disulfide interchange protein DsbA			41.09	7
SO0314	gi|24371912	speF	ornithine decarboxylase	1.61436	0.254287	18.47	18
SO0300	gi|24371898	lppC	lipoprotein	3.43558	0.19382	5.977	3
SO0298	gi|81589439	gmhA	Phosphoheptose isomerase; Sedoheptulose 7-phosphate isomerase	0.895365	0.778048	11.68	2
SO0294	gi|39932203	trpS	Tryptophan--tRNA ligase; Tryptophanyl-tRNA synthetase; TrpRS	1.25892	0.646717	12.05	3
SO0292	gi|24345716	rpe	ribulose-phosphate 3-epimerase			12	2
SO0287	gi|39931145	aroB	3-dehydroquinate synthase	0.544503	0.370188	4.178	2
SO0286	gi|38604873	aroK	Shikimate kinase; SK	0.816582	0.684914	34.5	6
SO0272	gi|81464064	pncC	CinA-like protein	0.990832	0.442607	8.019	4
SO0267	gi|24371865	ccmG	thiol:disulfide interchange protein DsbE	1.55597	0.685663	13.59	2
SO0265	gi|24371863	ccmI	hypothetical protein SO0265	1.92309	0.13981	9.639	3
SO0264	gi|24345679	scyA	cytochrome c			17.17	2
SO0257	gi|81744920	rplQ	50S ribosomal protein L17	0.855067	0.756166	29.01	7
SO0256	gi|41688704	rpoA	DNA-directed RNA polymerase subunit alpha; RNAP subunit alpha; RNA polymerase subunit alpha; Transcriptase subunit alpha	0.387258	0.0174552	28.27	15
SO0255	gi|26399362	rpsD	30S ribosomal protein S4	1.08643	0.516142	33.5	15
SO0254	gi|48474282	rpsK	30S ribosomal protein S11	1.52757	0.546486	36.15	6
SO0253	gi|32363324	rpsM	30S ribosomal protein S13	1.24738	0.574398	37.29	9
SO0250	gi|81744922	rplO	50S ribosomal protein L15	0.972747	0.702706	23.61	9
SO0248	gi|26399347	rpsE	30S ribosomal protein S5	1.15878	0.867802	58.08	20
SO0246	gi|81744923	rplF	50S ribosomal protein L6	1.22462	0.281126	51.98	19
SO0245	gi|67461206	rpsH	30S ribosomal protein S8	1.02802	0.91866	19.23	3
SO0244	gi|81589443	rpsN	30S ribosomal protein S14	1.07647	0.876347	18.81	2
SO0243	gi|50401271	rplE	50S ribosomal protein L5	0.855067	0.443779	49.16	16
SO0242	gi|46396920	rplX	50S ribosomal protein L24	0.405508	0.050095	28.85	5
SO0241	gi|81744924	rplN	50S ribosomal protein L14	1.22462	0.424055	27.87	6
SO0238	gi|24345649	rplP	ribosomal protein L16			19.85	6
SO0237	gi|27734494	rpsC	30S ribosomal protein S3	1.25892	0.67273	39.57	16
SO0236	gi|51316853	rplV	50S ribosomal protein L22	0.636796	0.723705	40	4
SO0235	gi|54036428	rpsS	30S ribosomal protein S19	0.580764	0.403629	27.17	3
SO0234	gi|42559256	rplB	50S ribosomal protein L2	0.772681	0.447226	25.18	12
SO0233	gi|124021018	rplW	50S ribosomal protein L23			20	3
SO0232	gi|46577265	rplD	50S ribosomal protein L4	0.824138	0.687988	18.41	5
SO0231	gi|42559642	rplC	50S ribosomal protein L3	1.22462	0.52452	13.21	3
SO0229	gi|81464079	tuf2	Elongation factor Tu 2; EF-Tu 2	0.401791	0.00880194	71.57	143
SO0228	gi|34395661	fusA	Elongation factor G 1; EF-G 1	0.60256	0.398314	21.35	16
SO0227	gi|62287336	rpsG	30S ribosomal protein S7	1.28233	0.480311	37.18	8
SO0226	gi|27151673	rpsL	30S ribosomal protein S12	1.05682	0.854006	15.32	3
SO0225	gi|41018042	rpoC	DNA-directed RNA polymerase subunit beta'; RNAP subunit beta'; RNA polymerase subunit beta'; Transcriptase subunit beta'	0.847227	0.98693	18.79	33
SO0224	gi|41018043	rpoB	DNA-directed RNA polymerase subunit beta; RNAP subunit beta; RNA polymerase subunit beta; Transcriptase subunit beta	0.666807	0.0572751	27.66	42
SO0223	gi|81589445	rplL	50S ribosomal protein L7/L12	0.963829	0.982141	53.28	10
SO0222	gi|29336680	rplJ	50S ribosomal protein L10	1.25892	0.676532	21.08	5
SO0221	gi|33301567	rplA	50S ribosomal protein L1	0.744732	0.15525	42.06	23
SO0220	gi|50403584	rplK	50S ribosomal protein L11	0.691831	0.518872	17.61	4
SO0219	gi|24371817	nusG	transcription antitermination protein NusG	1.10662	0.7251	41.53	11
SO0217	gi|81464081	tuf1	Elongation factor Tu 1; EF-Tu 1			71.57	143
SO0162	gi|31340276	pckA	Phosphoenolpyruvate carboxykinase [ATP]; PEP carboxykinase; PEPCK; Phosphoenolpyruvate carboxylase	1.34276	0.0796619	55.56	44
SO0139	gi|24345522	ftn	ferritin			11.8	2
SO0132	gi|24345515		flagellar protein FliL, putative			20.59	2
SO0110	gi|24371710		protease	1.47231	0.496251	5.817	2
SO0105	gi|48428645	selA	L-seryl-tRNA(Sec) selenium transferase; Selenocysteine synthase; Sec synthase; Selenocysteinyl-tRNA(Sec) synthase	1.55597	0.456405	5.92	2
SO0101	gi|24345477	fdnG	selenium-containing formate dehydrogenase, nitrate inducible, alpha subunit			2.49	3
SO0098	gi|73920009	hutH	Histidine ammonia-lyase; Histidase	0.731139	0.621126	11.89	7
SO0097	gi|44888063	hutU	Urocanate hydratase; Urocanase; Imidazolonepropionate hydrolase	0.744732	0.665261	13.31	11
SO0084	gi|81464286	mtnC	Enolase-phosphatase E1; 2,3-diketo-5-methylthio-1-phosphopentane phosphatase	0.570164	0.188861	26.55	8
SO0076	gi|24371676		hypothetical protein SO0076	0.92045	0.861276	13.29	10
SO0052	gi|81464339	secB	Protein-export protein SecB	1.03753	0.936501	28.03	4
SO0049	gi|27734302	gpmI	2,3-bisphosphoglycerate-independent phosphoglycerate mutase; BPG-independent PGAM; Phosphoglyceromutase; iPGM	0.717794	0.294373	16.15	8
SO0032	gi|32363158	def1	Peptide deformylase 1; PDF 1; Polypeptide deformylase 1	0.862979	0.509012	5.952	2
SO0027	gi|24345383	hemG	protoporphyrinogen oxidase, putative			22.28	3
SO0022	gi|81744939	pepQ	Xaa-Pro dipeptidase; X-Pro dipeptidase; Imidodipeptidase; Proline dipeptidase; Prolidase	0.946237	0.960411	4.784	2
SO0021	gi|81589467	fadB	Fatty acid oxidation complex subunit alpha; Includes: Enoyl-CoA hydratase/Delta(3)-cis-Delta(2)-trans-enoyl-CoA isomerase/3-hydroxybutyryl-CoA epimerase; Includes: 3-hydroxyacyl-CoA dehydrogenase	1.03753	0.495359	24.58	15
SO0020	gi|81744940	fadA	3-ketoacyl-CoA thiolase; Acetyl-CoA acyltransferase; Beta-ketothiolase; Fatty acid oxidation complex subunit beta	1.21339	0.638725	5.426	4
SO0014	gi|81845949	glyS	Glycine--tRNA ligase beta subunit; Glycyl-tRNA synthetase beta subunit; GlyRS	0.963829	0.881785	10.03	6
SO0011	gi|24371611	gyrB	DNA gyrase subunit B	0.895365	0.933892	3.727	5
SO0004	gi|38503016	yidC	Membrane protein insertase YidC; Foldase YidC; Membrane integrase YidC; Membrane protein YidC	1.6293	0.481639	3.882	2
SO0003	gi|205371772	mnmE	tRNA modification GTPase MnmE			2.208	2
	gi|414562273		protein of unknown function DUF2971			9.426	2
	gi|414562163		glutamate--cysteine ligase			2.305	3
	gi|414562114		3-oxoacyl-ACP synthase	0.92045	0.588593	36.72	28
	gi|414562067		phosphoribosylformylglycinamidine cyclo-ligase PurM			9.091	2
	gi|414562032		bifunctional 3-phosphoserine aminotransferase/phosphohydroxythreonine			11.72	4
	gi|414561979		adenine phosphoribosyltransferase Apt			11.6	3
	gi|414561941		predicted lipoprotein	0.787046	0.582659	8	2
	gi|386783244		Chain A, The Structure Of A Putative Lipoprotein Of Unknown Function From Shewanella Oneidensis.			6.993	3
	gi|28275223		cold shock domain-contain protein			26.09	2
	gi|259706759		unnamed protein product			24.3	14
	gi|259706467		unnamed protein product			8.014	2
	gi|259705475		unnamed protein product			8.014	2
	gi|259704995		unnamed protein product			14.03	5
	gi|259704527		unnamed protein product			27.35	7
	gi|259703609		unnamed protein product			21.23	6
	gi|259703459		unnamed protein product			12.21	6
	gi|259701375		unnamed protein product			27.35	7
	gi|259700979		unnamed protein product			4.677	2
	gi|259700977		unnamed protein product			3.926	2
	gi|259700975		unnamed protein product			9.524	3
	gi|259700811		unnamed protein product			14.03	5
	gi|259691381		unnamed protein product			8.014	2
	gi|259688956		unnamed protein product			7.407	2
	gi|259682417		unnamed protein product			12.21	6
	gi|259681895		unnamed protein product			5.778	3
	gi|259681887		unnamed protein product			3.926	2
	gi|259679331		unnamed protein product			14.03	5
	gi|259674495		unnamed protein product			11.67	6
	gi|259674493		unnamed protein product			40.94	11
	gi|259673945		unnamed protein product			5.778	3
	gi|259673897		unnamed protein product			24.58	15
	gi|259672755		unnamed protein product			3.926	2
	gi|259666698		unnamed protein product			4.918	2
	gi|259666030		unnamed protein product			5.449	2
	gi|259665048		unnamed protein product			51.31	13
	gi|259664452		unnamed protein product			22.22	10
	gi|259664450		unnamed protein product			30.23	11
	gi|259655068		unnamed protein product			18.56	10
	gi|259655066		unnamed protein product			5.866	3
	gi|259655064		unnamed protein product			11.17	6
	gi|259653685		unnamed protein product			5.778	3
	gi|259653677		unnamed protein product			3.926	2
	gi|259652405		unnamed protein product			8.014	2
	gi|259651889		unnamed protein product			5.778	3
	gi|259651881		unnamed protein product			3.926	2
	gi|259476610		unnamed protein product			5.449	2
	gi|259472647		unnamed protein product			24.3	14
	gi|259464191		unnamed protein product			37.29	4
	gi|259463375		unnamed protein product			16.28	11
	gi|259460070		unnamed protein product			12.97	8
	gi|259460068		unnamed protein product			4.498	3
	gi|259456450		unnamed protein product			21.23	6
	gi|259452455		unnamed protein product			8.014	2
	gi|259451969		unnamed protein product			5.778	3
	gi|259451961		unnamed protein product			3.926	2
	gi|259440502		unnamed protein product			8.014	2
	gi|257696670		unnamed protein product	1.09648	0.6266	22.55	6
	gi|257691712		unnamed protein product			22.55	6
	gi|257653501		unnamed protein product			22.55	6
	gi|257626473		unnamed protein product	0.963829	0.954964	21.41	6
	gi|257335208		unnamed protein product			21.23	6
	gi|257325704		unnamed protein product			21.41	6
	gi|257316600		unnamed protein product			22.55	6
	gi|257287970		unnamed protein product			22.55	6
	gi|257287692		unnamed protein product			22.55	6
	gi|24376352		ISSod4, transposase	1.10662	0.787881	5.5	2
	gi|24376341		ISSod4, transposase			5.5	2
	gi|24376307		ISSod4, transposase			5.5	2
	gi|24376289		parA protein, putative			7.895	2
	gi|24376269		mRNA endonuclease-like protein PemK			11.43	2
	gi|24376263		ISSod4, transposase			5.5	2
	gi|24376230		tRNA uridine 5-carboxymethylaminomethyl modification protein GidA			3.498	2
	gi|24376223		ATP synthase F0F1 subunit B			16.67	3
	gi|24376221		ATP synthase F0F1 subunit alpha			18.71	10
	gi|24376220		ATP synthase F0F1 subunit gamma			23.43	5
	gi|24376219		ATP synthase F0F1 subunit beta			36.07	22
	gi|24376217		UDP-N-acetylglucosamine pyrophosphorylase			4.185	2
	gi|24376213		glucosamine--fructose-6-phosphate aminotransferase			10.84	7
	gi|24376211		naphthoate synthase	0.92045	0.712686	12.33	3
	gi|24376195		bifunctional molybdopterin-guanine dinucleotide biosynthesis protein MobB/MoeA	0.912011	0.586909	8.681	4
	gi|24376179		ISSod4, transposase			5.5	2
	gi|24376174		glutathione reductase	0.824138	0.712503	11.53	5
	gi|24376171		oligopeptidase A			18.56	10
	gi|24376165		multidrug resistance protein AcrA/AcrE family	1.14815	0.767192	15.45	5
	gi|24376145		L-threonine 3-dehydrogenase			17.3	5
	gi|24376139		ribosome biogenesis GTP-binding protein YsxC			12.33	3
	gi|24376131		hypothetical protein SO4659	1.09648	0.910106	8.185	2
	gi|24376059		cell division protein FtsY	0.946237	0.925704	4.51	2
	gi|24376055		ISSod4, transposase			5.5	2
	gi|24376019		ISSod4, transposase			5.5	2
	gi|24375931		electron transfer flavoprotein-ubiquinone oxidoreductase			4.918	2
	gi|24375885		catalase/peroxidase HPI			3.297	3
	gi|24375867		ISSod4, transposase			5.5	2
	gi|24375865		hypothetical protein SO4384	1.24738	0.511067	27.53	6
	gi|24375852		hypothetical protein SO4371	0.847227	0.352776	4.405	2
	gi|24375815		hypothetical protein SO4334			6.181	2
	gi|24375795		porphobilinogen deaminase			28.71	11
	gi|24375743		ISSod4, transposase			5.5	2
	gi|24375741		hypothetical protein SO4257			8.014	2
	gi|24375739		orotate phosphoribosyltransferase			11.16	4
	gi|24375731		50S ribosomal protein L28			24.36	3
	gi|24375708		UDP-N-acetylmuramoylalanyl-D-glutamyl-2,6-diaminopimelate--D-alanyl-D-alanyl ligase	0.903649	0.773174	6.522	2
	gi|24375706		UDP-N-acetylmuramoyl-L-alanyl-D-glutamate synthetase			8.656	4
	gi|24375700		cell division protein FtsZ	1.04713	0.855245	15.95	5
	gi|24375696		preprotein translocase subunit SecA			13.77	10
	gi|24375693		delta-aminolevulinic acid dehydratase	0.912011	0.867488	8.929	3
	gi|24375682		ribonuclease activity regulator protein RraA			6.832	2
	gi|24375651		ISSod4, transposase			5.5	2
	gi|24375649		ATP-dependent protease ATP-binding subunit HslU			12.27	6
	gi|24375648		ATP-dependent protease peptidase subunit			7.471	2
	gi|24375609		arginyl-tRNA synthetase			22.38	12
	gi|24375604		malate oxidoreductase	0.824138	0.722249	6.763	2
	gi|24375593		MSHA pilin protein MshB	0.981748	0.67938	13.17	2
	gi|24375585		rod shape-determining protein MreB	0.928966	0.892977	12.32	3
	gi|24375578		tldD protein	0.946237	0.915799	4.564	2
	gi|24375553		phosphoribosylaminoimidazolesuccinocarboxamide synthase			30.79	11
	gi|24375540		methyl-accepting chemotaxis protein			3.312	2
	gi|24375521		ATP-dependent RNA helicase DeaD			5.778	3
	gi|24375515		single-strand binding protein			10.08	6
	gi|24375511		ISSod4, transposase			5.5	2
	gi|24375490		response regulator	1.1695	0.603875	11.48	3
	gi|24375478		fructose-1,6-bisphosphatase			21.23	6
	gi|24375477		dipeptidyl peptidase IV	0.954993	0.919334	2.359	2
	gi|24375475		two-component response regulator	0.77983	0.515666	57.56	27
	gi|24375454		molybdate ABC transporter substrate-binding protein			11.67	6
	gi|24375449		ribosomal subunit interface protein	0.954993	0.944912	22.11	3
	gi|24375435		UDP-N-acetylglucosamine 1-carboxyvinyltransferase			10.02	3
	gi|24375432		ISSod4, transposase			5.5	2
	gi|24375428		50S ribosomal protein L13			28.17	4
	gi|24375427		30S ribosomal protein S9			24.62	9
	gi|24375425		adenylosuccinate synthetase			16.94	9
	gi|24375422		23S rRNA (guanosine-2'-O-)-methyltransferase			15.04	4
	gi|24375418		30S ribosomal protein S6			16.79	2
	gi|24375415		50S ribosomal protein L9			57.33	20
	gi|24375394		hypothetical protein SO3906	1.14815	0.706161	6.211	2
	gi|24375370		ISSod4, transposase			5.5	2
	gi|24375364		ISSod4, transposase			5.5	2
	gi|24375352		molybdenum ABC transporter substrate-binding protein			40.94	11
	gi|24375347		ISSod4, transposase			5.5	2
	gi|24375344		malate dehydrogenase			14.95	10
	gi|24375341		hypothetical protein SO3852	1.05682	0.717906	13.64	2
	gi|24375327		ribose-phosphate pyrophosphokinase			8.254	3
	gi|24375323		peptide chain release factor 1			8.815	2
	gi|24375317		2-dehydro-3-deoxyphosphooctonate aldolase			22.34	5
	gi|24375315		ISSod4, transposase			5.5	2
	gi|24375305		peptidyl-prolyl cis-trans isomerase A			23.59	4
	gi|24375298		UDP-N-acetylmuramate:L-alanyl-gamma-D-glutamyl-meso-diaminopimelate ligase	0.981748	0.944697	12.26	4
	gi|24375269		hypothetical protein SO3775	1.20226	0.752675	9.426	2
	gi|24375268		bifunctional proline dehydrogenase/pyrroline-5-carboxylate dehydrogenase			25.4	28
	gi|24375266		hypothetical protein SO3772			28.57	3
	gi|24375247		ISSod4, transposase			5.5	2
	gi|24375233		sulfite reductase subunit beta			6.195	4
	gi|24375232		phosphoadenosine phosphosulfate reductase			5.714	2
	gi|24375209		ISSod4, transposase			5.5	2
	gi|24375192		dihydroorotase			10.5	4
	gi|24375162		long-chain-fatty-acid--CoA ligase			12.97	8
	gi|24375151		50S ribosomal protein L21			43.69	7
	gi|24375137		4-hydroxythreonine-4-phosphate dehydrogenase			4.878	2
	gi|24375136		survival protein surA			9.447	3
	gi|24375104		ISSod4, transposase			5.5	2
	gi|24375102		sulfate ABC transporter ATP-binding protein			2.926	2
	gi|24375094		transcriptional regulator RstA	1.09648	0.699669	12.66	4
	gi|24375081		hypothetical protein SO3580	0.794328	0.671426	9.328	2
	gi|24375079		clpB protein			30.11	32
	gi|24375068		peptidyl-dipeptidase Dcp			5.866	3
	gi|24375058		phosphoribosylaminoimidazole carboxylase catalytic subunit	0.912011	0.568672	15.34	3
	gi|24375051		glucose-6-phosphate isomerase			15.78	7
	gi|24375050		transaldolase B			25.79	8
	gi|24375036		isoleucyl-tRNA synthetase			5.426	7
	gi|24375026		ISSod4, transposase			5.5	2
	gi|24375022		ISSod4, transposase			5.5	2
	gi|24375002		aldehyde dehydrogenase	0.879022	0.854387	8.032	4
	gi|24374977		serine hydroxymethyltransferase			25.66	16
	gi|24374973		3,4-dihydroxy-2-butanone 4-phosphate synthase	1	0.967301	19.35	8
	gi|24374972		6,7-dimethyl-8-ribityllumazine synthase			32.28	5
	gi|24374971		transcription antitermination protein NusB			31.34	3
	gi|24374961		GTP pyrophosphokinase	0.903649	0.85371	6.259	4
	gi|24374959		ISSod4, transposase			5.5	2
	gi|24374953		ISSod4, transposase			5.5	2
	gi|24374951		CTP synthetase			22.71	11
	gi|24374950		enolase			55.03	35
	gi|24374940		recombinase A			27.45	10
	gi|24374938		alanyl-tRNA synthetase			16.7	15
	gi|24374934		valyl-tRNA synthetase			9.186	7
	gi|24374913		ribosomal subunit interface protein			37.29	4
	gi|24374909		ISSod4, transposase			5.5	2
	gi|24374903		oxidoreductase, FMN-binding			21.41	6
	gi|24374874		LysR family transcriptional regulator			5.449	2
	gi|24374872		hypothetical protein SO3361	0.937562	0.908566	4.228	3
	gi|24374854		hypothetical protein SO3343	0.862979	0.333941	14.52	4
	gi|24374822		histidyl-tRNA synthetase			12.47	4
	gi|24374804		inosine 5'-monophosphate dehydrogenase	1.01859	0.388894	30.33	17
	gi|24374803		GMP synthase			26.67	19
	gi|24374798		phosphoribosylformylglycinamidine synthase			9.745	12
	gi|24374782		polysaccharide biosynthesis protein	0.92045	0.808525	7.855	2
	gi|24374763		chemotaxis protein CheV	0.963829	0.950477	8.17	2
	gi|24374750		flagellin			37	10
	gi|24374718		chemotaxis-specific methylesterase			7.219	2
	gi|24374714		purine-binding chemotaxis protein CheW	0.870964	0.69808	25	7
	gi|24374702		polysaccharide biosynthesis protein			27.35	7
	gi|24374698		polysaccharide biosynthesis protein	0.862979	0.311304	15.92	9
	gi|24374691		hypothetical protein SO3178	0.990832	0.839051	15.38	4
	gi|24374667		prolyl-tRNA synthetase			33.51	18
	gi|24374659		H-NS family DNA-binding protein	0.928966	0.297516	52.31	8
	gi|24374656		peptidyl-dipeptidase Dcp			11.17	6
	gi|24374638		Gfo/Idh/MocA family oxidoreductase			4.575	3
	gi|24374633		S-adenosylmethionine--tRNA ribosyltransferase-isomerase			4.348	2
	gi|24374632		queuine tRNA-ribosyltransferase			14.71	5
	gi|24374630		preprotein translocase subunit SecD	1.28233	0.292866	11.04	6
	gi|24374589		bifunctional folylpolyglutamate synthase/dihydrofolate synthase			5.104	2
	gi|24374567		ISSod4, transposase			5.5	2
	gi|24374443		phosphate acetyltransferase	1.01859	0.442393	6.974	4
	gi|24374442		acetate kinase			7.018	4
	gi|24374432		cysteine synthase A			55.28	26
	gi|24374425		NAD-dependent DNA ligase			3.483	2
	gi|24374410		superoxide dismutase, Fe	0.77983	0.487972	46.39	12
	gi|24374368		hypothetical protein SO2839	0.816582	0.495314	15.17	2
	gi|24374367		DEAD/DEAH box helicase			4.677	2
	gi|24374361		hypothetical protein SO2832			19.49	2
	gi|24374360		GTP cyclohydrolase II			7.882	2
	gi|24374349		ISSod4, transposase			5.5	2
	gi|24374345		ISSod4, transposase			5.5	2
	gi|24374326		cytidine deaminase			8.108	2
	gi|24374322		cold shock domain-contain protein	1.04713	0.409998	73.91	8
	gi|24374316		3-oxoacyl-ACP synthase			19.44	9
	gi|24374315		ACP S-malonyltransferase	0.765597	0.380272	9.74	3
	gi|24374313		acyl carrier protein			28.57	2
	gi|24374312		3-oxoacyl-ACP synthase			2.427	2
	gi|24374307		hypothetical protein SO2769	0.887156	0.666506	15.6	3
	gi|24374306		acyl-CoA dehydrogenase	1.14815	0.118505	9.899	5
	gi|24374289		translocation protein TolB			21.72	9
	gi|24374288		peptidoglycan-associated lipoprotein	1.0666	0.803564	12.43	2
	gi|24374284		acetyl-CoA synthetase			21.54	16
	gi|24374272		glucan biosynthesis protein G			16.86	13
	gi|24374271		peptidase E			15.25	4
	gi|24374247		succinylarginine dihydrolase			10.14	4
	gi|24374246		DNA topoisomerase I	1.01859	0.674864	3.645	2
	gi|24374190		transcriptional regulator CysB			7.407	2
	gi|24374177		hypothetical protein SO2636	0.879022	0.873446	2.632	2
	gi|24374175		hypothetical protein SO2634			7.317	2
	gi|24374161		methionyl-tRNA synthetase			10.5	7
	gi|24374144		carboxy-terminal protease			16.28	11
	gi|24374143		aminopeptidase	1.01859	0.861283	3.298	4
	gi|24374136		hypothetical protein SO2593	0.981748	0.728238	26.95	56
	gi|24374135		dihydroorotate dehydrogenase 2			4.72	2
	gi|24374126		hypothetical protein SO2583	0.937562	0.838346	24.07	5
	gi|24374124		long-chain-fatty-acid--CoA ligase	1.14815	0.736815	6.463	3
	gi|24374119		septum formation inhibitor			12.22	2
	gi|24374113		lipoprotein	0.895365	0.838494	6.757	3
	gi|24374110		ribonuclease activity regulator protein RraA			6.098	2
	gi|24374073		peptide deformylase			15.95	2
	gi|24374054		electron transport complex protein RnfC			3.418	2
	gi|24374047		queuosine biosynthesis protein QueC			10.92	2
	gi|24374031		phosphogluconate dehydratase	0.887156	0.574376	13.16	7
	gi|24374029		deoxyguanosinetriphosphate triphosphohydrolase-like protein			6.576	2
	gi|24374027		aminotransferase	0.972747	0.963892	13.37	4
	gi|24374022		3-deoxy-manno-octulosonate cytidylyltransferase			8.163	2
	gi|24374020		polysaccharide biosynthesis protein			24.3	14
	gi|24373980		aspartyl-tRNA synthetase			27.07	19
	gi|24373963		ribonucleotide-diphosphate reductase subunit beta	0.963829	0.960141	6.383	2
	gi|24373960		3-demethylubiquinone-9 3-methyltransferase			12.29	2
	gi|24373953		aromatic amino acid aminotransferase			22.22	10
	gi|24373950		cytidylate kinase			10.87	5
	gi|24373949		30S ribosomal protein S1	0.92045	0.658482	44.86	49
	gi|24373945		orotidine 5'-phosphate decarboxylase			12.99	3
	gi|24373944		short chain dehydrogenase	0.787046	0.602969	17.45	3
	gi|24373942		acyl-CoA dehydrogenase	0.855067	0.213002	9.573	5
	gi|24373939		ISSod4, transposase			5.5	2
	gi|24373897		aromatic amino acid aminotransferase			30.23	11
	gi|24373891		ISSod4, transposase			5.5	2
	gi|24373887		alpha keto acid dehydrogenase complex, E1 component, beta subunit	0.972747	0.847697	18.77	7
	gi|24373886		alpha keto acid dehydrogenase complex, E1 component, alpha subunit	0.903649	0.780884	22.19	9
	gi|24373885		succinylglutamate desuccinylase			13.66	5
	gi|24373882		replication initiation regulator SeqA			6.557	2
	gi|24373875		translation elongation factor P Efp			38.71	6
	gi|24373869		ISSod4, transposase			5.5	2
	gi|24373862		seryl-tRNA synthetase			14.95	5
	gi|24373856		thioredoxin reductase	1.0666	0.296373	35.96	9
	gi|24373855		50S ribosomal protein L20			29.66	7
	gi|24373852		threonyl-tRNA synthetase			13.24	8
	gi|24373845		ISSod4, transposase			5.5	2
	gi|24373827		nucleoside diphosphate kinase			67.13	24
	gi|24373825		ISSod4, transposase			5.5	2
	gi|24373823		ribosomal protein S6 modification protein			9.365	2
	gi|24373821		chaperone protein HscA			15	7
	gi|24373817		cysteine desulfurase			25.99	12
	gi|24373813		extragenic suppressor protein SuhB			51.31	13
	gi|24373803		beta-hexosaminidase			11.11	4
	gi|24373801		L-serine dehydratase 1	0.765597	0.661665	5.677	2
	gi|24373793		methyl-accepting chemotaxis protein			4.771	2
	gi|24373777		peptidase	0.912011	0.944446	6.55	4
	gi|24373776		fumarate hydratase, class I, anaerobic			12.21	6
	gi|24373772		asparaginyl-tRNA synthetase			21.89	10
	gi|24373667		periplasmic glucan biosynthesis protein OpgG			10.44	3
	gi|24373646		phenylalanyl-tRNA synthetase subunit beta			13.33	13
	gi|24373645		phenylalanyl-tRNA synthetase subunit alpha			11.31	4
	gi|24373638		ISSod4, transposase			5.5	2
	gi|24373614		S-(hydroxymethyl)glutathione dehydrogenase FrmA			8.971	4
	gi|24373607		prolyl oligopeptidase	1.25892	0.213606	3.73	2
	gi|24373606		MarR family transcriptional regulator	1.14815	0.77027	5.882	2
	gi|24373581		adenylate kinase			37.85	6
	gi|24373579		heat shock protein 90			52.43	57
	gi|24373535		AMP-binding protein			4.498	3
	gi|24373513		invasin domain-containing protein	1.1695	0.985338	3.153	4
	gi|24373496		succinyl-CoA synthetase subunit beta			40.21	30
	gi|24373493		succinate dehydrogenase iron-sulfur subunit			22.55	6
	gi|24373490		type II citrate synthase	0.862979	0.598854	26.64	24
	gi|24373463		transcriptional regulator	1.07647	0.837549	11.94	2
	gi|24373462		isovaleryl-CoA dehydrogenase	1.04713	0.940392	21.85	9
	gi|24373460		enoyl-CoA hydratase/isomerase	0.879022	0.812618	13.54	5
	gi|24373458		hydroxymethylglutaryl-CoA lyase	1.03753	0.798179	10.16	4
	gi|24373456		3-oxoadipate CoA-succinyl transferase subunit beta	0.990832	0.97999	20.18	5
	gi|24373445		lipoprotein-34 NlpB			8.767	3
	gi|24373440		ISSod4, transposase			5.5	2
	gi|24373435		arginine decarboxylase			11.77	7
	gi|24373421		3-hydroxydecanoyl-ACP dehydratase			25.15	8
	gi|24373381		hypothetical protein SO1816			11.95	3
	gi|24373365		trans-2-enoyl-CoA reductase			17	6
	gi|24373362		ATP-dependent protease La	0.954993	0.62156	14.52	12
	gi|24373359		trigger factor			59.68	46
	gi|24373358		bifunctional 5,10-methylene-tetrahydrofolate dehydrogenase/ 5,10-methylene-tetrahydrofolate cyclohydrolase			9.859	3
	gi|24373357		cysteinyl-tRNA synthetase			9.368	4
	gi|24373356		peptidyl-prolyl cis-trans isomerase B			32.32	5
	gi|24373352		glutaminyl-tRNA synthetase			14.57	8
	gi|24373334		ISSod4, transposase			5.5	2
	gi|24373330		streptogramin A acetyl transferase	0.809096	0.622318	13.33	3
	gi|24373317		ABC transporter ATP-binding protein			18.15	4
	gi|24373249		enoyl-CoA hydratase/isomerase	0.954993	0.855738	26.11	14
	gi|24373235		pterin-4-alpha-carbinolamine dehydratase			27.68	3
	gi|24373233		UTP-glucose-1-phosphate uridylyltransferase	0.963829	0.764306	24.5	9
	gi|24373209		UDP-N-acetylglucosamine acyltransferase	0.963829	0.990069	11.72	3
	gi|24373208		(3R)-hydroxymyristoyl-ACP dehydratase			17.53	2
	gi|24373205		surface antigen	1.18032	0.735875	7.869	5
	gi|24373200		ribosome recycling factor			42.7	9
	gi|24373198		elongation factor Ts			60.78	32
	gi|24373197		30S ribosomal protein S2			27.27	10
	gi|24373195		methionine aminopeptidase	1.00925	0.880813	20	4
	gi|24373193		2,3,4,5-tetrahydropyridine-2,6-carboxylate N-succinyltransferase			14.23	3
	gi|24373185		ISSod4, transposase			5.5	2
	gi|24373177		7-cyano-7-deazaguanine reductase			10.44	3
	gi|24373145		NOL1/NOP2/sun family RNA methylase			5.144	2
	gi|24373126		recombination associated protein			13.16	4
	gi|24373121		hypothetical protein SO1550	0.972747	0.917385	11.09	6
	gi|24373098		heat shock protein GrpE			16.02	4
	gi|24373057		malate synthase	1.11686	0.807033	4.554	2
	gi|24373035		type I restriction-modification system subunit S	1.30617	0.612007	6.951	2
	gi|24373014		ISSod4, transposase			5.5	2
	gi|24373007		anaerobic dimethyl sulfoxide reductase subunit A	1.02802	0.360822	2.871	2
	gi|24372983		transglutaminase			9.499	2
	gi|24372961		DEAD/DEAH box helicase			3.926	2
	gi|24372946		leucyl aminopeptidase			9.761	5
	gi|24372938		50S ribosomal protein L19			30.77	8
	gi|24372934		signal recognition particle protein	0.937562	0.99133	11.38	5
	gi|24372929		pyridoxine 5'-phosphate synthase			15.51	5
	gi|24372926		ribonuclease III			10.18	3
	gi|24372924		GTP-binding protein LepA			9.396	4
	gi|24372913		thymidylate synthase			11.36	3
	gi|24372905		sensor histidine kinase-like protein	0.816582	0.687846	23.14	2
	gi|24372893		tyrosyl-tRNA synthetase			25.13	11
	gi|24372879		aspartate carbamoyltransferase	0.92045	0.876742	7.375	3
	gi|24372878		glutamate-1-semialdehyde aminotransferase			28.84	14
	gi|24372875		major outer membrane lipoprotein	1.2942	0.722709	26.14	2
	gi|24372871		dihydroneopterin aldolase	0.855067	0.776452	22.41	3
	gi|24372864		RNA polymerase sigma-70 factor	1.03753	0.918552	9.74	6
	gi|24372851		polyamine ABC transporter periplasmic polyamine-binding protein	1.05682	0.797473	24.52	7
	gi|24372850		ISSod4, transposase			5.5	2
	gi|24372808		hypothetical protein SO1227	0.981748	0.703742	10.77	2
	gi|24372802		purine nucleoside phosphorylase			43.22	24
	gi|24372800		phosphopentomutase			8.416	3
	gi|24372799		thymidine phosphorylase			27.77	15
	gi|24372798		deoxyribose-phosphate aldolase			41.41	13
	gi|24372796		outer membrane protein OmpK	0.794328	0.68504	10.6	4
	gi|24372791		polynucleotide phosphorylase			31.34	39
	gi|24372789		30S ribosomal protein S15			38.2	2
	gi|24372788		ribosome-binding factor A			17.69	3
	gi|24372787		translation initiation factor IF-2			22.82	22
	gi|24372786		transcription elongation factor NusA			14.03	5
	gi|24372785		hypothetical protein SO1202			14.57	2
	gi|24372783		triosephosphate isomerase			22.31	6
	gi|24372779		23S rRNA methyltransferase			3.828	2
	gi|24372778		hypothetical protein SO1195	0.92045	0.943339	9.091	2
	gi|24372768		GTP-dependent nucleic acid-binding protein EngD	0.972747	0.971847	32.78	13
	gi|24372764		(dimethylallyl)adenosine tRNA methylthiotransferase			7.173	3
	gi|24372757		leucyl-tRNA synthetase			8.149	6
	gi|24372746		hypothetical protein SO1163			32.95	3
	gi|24372744		lipoyl synthase			6.231	2
	gi|24372733		ribose-5-phosphate isomerase A			24.66	5
	gi|24372728		magnesium transporter	1.07647	0.872955	7.002	3
	gi|24372724		carbamoyl phosphate synthase small subunit			16.84	7
	gi|24372710		molecular chaperone DnaJ			19.05	7
	gi|24372709		molecular chaperone DnaK			41	34
	gi|24372705		gamma-glutamyl phosphate reductase			8	5
	gi|24372698		aminoacyl-histidine dipeptidase	0.937562	0.89012	4.321	3
	gi|24372685		S-ribosylhomocysteinase			16.57	3
	gi|24372679		O-acetylhomoserine (thiol)-lyase	0.912011	0.864024	5.581	2
	gi|24372645		hypothetical protein SO1060	1.24738	0.280666	43.15	7
	gi|24372612		ISSod4, transposase			5.5	2
	gi|24372606		NADH dehydrogenase subunit B			4.018	2
	gi|24372605		bifunctional NADH:ubiquinone oxidoreductase subunit C/D			6.323	4
	gi|24372602		NADH dehydrogenase subunit G			8.361	6
	gi|24372578		lysyl-tRNA synthetase			20.8	14
	gi|24372557		fumarate reductase flavoprotein subunit			47.15	46
	gi|24372555		D-lactate dehydrogenase	1.03753	0.910895	6.383	2
	gi|24372534		ATP-dependent RNA helicase SrmB			9.524	3
	gi|24372519		phosphoglycerate kinase			47.83	28
	gi|24372517		transketolase	0.847227	0.4697	27.71	22
	gi|24372516		S-adenosylmethionine synthetase			7.05	3
	gi|24372495		Na(+)-translocating NADH-quinone reductase subunit F	0.963829	0.95395	8.642	3
	gi|24372477		amidase	0.912011	0.834686	7.218	4
	gi|24372458		pantoate--beta-alanine ligase			10.32	2
	gi|24372451		D-3-phosphoglycerate dehydrogenase			14.91	5
	gi|24372450		hypothetical protein SO0861	0.981748	0.551117	14.47	4
	gi|24372437		nitrate reductase catalytic subunit			9.08	6
	gi|24372431		elongation factor G			43.9	59
	gi|24372420		glutathione synthetase			8.571	2
	gi|24372419		alkaline phosphatase	0.879022	0.811713	4.626	2
	gi|24372396		hypoxanthine-guanine phosphoribosyltransferase			31.38	3
	gi|24372384		hypothetical protein SO0795	0.928966	0.549036	7.264	4
	gi|24372372		hypothetical protein SO0783	0.928966	0.963601	8.006	4
	gi|24372370		glycine dehydrogenase			25.99	28
	gi|24372368		glycine cleavage system aminomethyltransferase T			4.121	6
	gi|24372359		malate dehydrogenase			68.81	59
	gi|24372353		hypothetical protein SO0764	1.02802	0.981431	17.47	4
	gi|24372295		molecular chaperone GroEL			68.44	92
	gi|24372294		co-chaperonin GroES			25	4
	gi|24372282		hypothetical protein SO0691	0.887156	0.566179	37.31	5
	gi|24372215		cAMP-regulatory protein	0.954993	0.762199	51.66	10
	gi|24372210		succinylglutamic semialdehyde dehydrogenase			16.22	7
	gi|24372209		arginine N-succinyltransferase	0.981748	0.663579	3.54	2
	gi|24372208		bifunctional N-succinyldiaminopimelate-aminotransferase/acetylornithine transaminase			46.67	21
	gi|24372194		host factor-I protein			14.44	3
	gi|24372193		tRNA delta(2)-isopentenylpyrophosphate transferase			8.766	3
	gi|24372187		ISSod4, transposase			5.5	2
	gi|24372182		ribosome-associated GTPase			11.02	3
	gi|24372171		hypothetical protein SO0578	0.928966	0.819006	5.875	3
	gi|24372168		ATP-dependent helicase HepA			2.169	2
	gi|24372161		hypothetical protein SO0568	0.92045	0.368247	36.57	4
	gi|24372154		formate--tetrahydrofolate ligase			5.263	2
	gi|24372112		outer membrane efflux family protein			6.416	2
	gi|24372051		hypothetical protein SO0456	1.05682	0.721486	25.79	8
	gi|24372037		bifunctional phosphoribosylaminoimidazolecarboxamide formyltransferase/IMP cyclohydrolase			20.07	10
	gi|24372030		uroporphyrinogen decarboxylase			18.64	5
	gi|24372024		M13 family peptidase	1	0.670388	19.26	13
	gi|24372019		pyruvate dehydrogenase subunit E1	0.801678	0.220313	16.44	17
	gi|24372002		thioredoxin 1	1.10662	0.824138	28.7	2
	gi|24371974		ISSod4, transposase			5.5	2
	gi|24371954		ISSod4, transposase			5.5	2
	gi|24371941		aconitate hydratase	1.18032	0.344713	7.958	10
	gi|24371940		hypothetical protein SO0342	1.20226	0.709516	13.6	4
	gi|24371938		branched-chain amino acid aminotransferase			8.54	3
	gi|24371931		thiol:disulfide interchange protein DsbA	1.08643	0.594746	41.09	7
	gi|24371896		phosphoheptose isomerase			11.68	2
	gi|24371892		tryptophanyl-tRNA synthetase			12.05	3
	gi|24371890		ribulose-phosphate 3-epimerase	0.809096	0.535061	12	2
	gi|24371885		3-dehydroquinate synthase			4.178	2
	gi|24371884		shikimate kinase			34.5	6
	gi|24371870		competence/damage-inducible protein CinA			8.019	4
	gi|24371862		cytochrome c	0.895365	0.876868	17.17	2
	gi|24371855		50S ribosomal protein L17			29.01	7
	gi|24371854		DNA-directed RNA polymerase subunit alpha			28.27	15
	gi|24371853		30S ribosomal protein S4			33.5	15
	gi|24371852		30S ribosomal protein S11			36.15	6
	gi|24371851		30S ribosomal protein S13			37.29	9
	gi|24371848		50S ribosomal protein L15			23.61	9
	gi|24371846		30S ribosomal protein S5			58.08	20
	gi|24371844		50S ribosomal protein L6			51.98	19
	gi|24371843		30S ribosomal protein S8			19.23	3
	gi|24371842		30S ribosomal protein S14			18.81	2
	gi|24371841		50S ribosomal protein L5			49.16	16
	gi|24371840		50S ribosomal protein L24			28.85	5
	gi|24371839		50S ribosomal protein L14			27.87	6
	gi|24371836		50S ribosomal protein L16			19.85	6
	gi|24371835		30S ribosomal protein S3			39.57	16
	gi|24371834		50S ribosomal protein L22			40	4
	gi|24371833		30S ribosomal protein S19			27.17	3
	gi|24371832		50S ribosomal protein L2			25.18	12
	gi|24371831		50S ribosomal protein L23	1.0666	0.860643	19.8	3
	gi|24371830		50S ribosomal protein L4			18.41	5
	gi|24371829		50S ribosomal protein L3			13.21	3
	gi|24371827		elongation factor Tu			71.57	143
	gi|24371826		elongation factor G			21.35	16
	gi|24371825		30S ribosomal protein S7			37.18	8
	gi|24371824		30S ribosomal protein S12			15.32	3
	gi|24371823		DNA-directed RNA polymerase subunit beta'			18.79	33
	gi|24371822		DNA-directed RNA polymerase subunit beta			27.66	42
	gi|24371821		50S ribosomal protein L7/L12			53.28	10
	gi|24371820		50S ribosomal protein L10			21.08	5
	gi|24371819		50S ribosomal protein L1			42.06	23
	gi|24371818		50S ribosomal protein L11			17.61	4
	gi|24371815		elongation factor Tu			71.57	143
	gi|24371762		phosphoenolpyruvate carboxykinase			55.56	44
	gi|24371739		ferritin			11.8	2
	gi|24371732		flagellar basal body-associated protein FliL-like protein	1.09648	0.839708	20.59	2
	gi|24371705		selenocysteine synthase			5.92	2
	gi|24371701		selenium-containing formate dehydrogenase, nitrate inducible, alpha subunit	0.855067	0.772802	2.49	3
	gi|24371698		histidine ammonia-lyase			11.89	7
	gi|24371697		urocanate hydratase			13.31	11
	gi|24371684		HAD-superfamily hydrolase			26.55	8
	gi|24371652		preprotein translocase subunit SecB			28.03	4
	gi|24371649		phosphoglyceromutase			16.15	8
	gi|24371632		peptide deformylase			5.952	2
	gi|24371627		protoporphyrinogen oxidase	0.937562	0.966365	22.28	3
	gi|24371622		proline dipeptidase			4.784	2
	gi|24371621		multifunctional fatty acid oxidation complex subunit alpha			24.58	15
	gi|24371620		3-ketoacyl-CoA thiolase			5.426	4
	gi|24371614		glycyl-tRNA synthetase subunit beta			10.03	6
	gi|24371604		inner membrane protein, 60 kDa			3.882	2
	gi|24350380		ISSod4, transposase			5.5	2
	gi|24350197		ISSod4, transposase			5.5	2
	gi|24350125		ISSod4, transposase			5.5	2
	gi|24350044		ISSod4, transposase			5.5	2
	gi|24349680		ISSod4, transposase			5.5	2
	gi|24348283		ISSod4, transposase			5.5	2
	gi|24348249		ISSod4, transposase			5.5	2
	gi|24347979		ISSod4, transposase			5.5	2
	gi|24347176		ISSod4, transposase			5.5	2
	gi|24345797		ISSod4, transposase			5.5	2
	gi|24344732		ISSod4 transposase, TnpAISSod446			5.5	2
	gi|229220631	AguA	agmatine deiminase			12.97	6
	gi|229220630		dihydrodipicolinate reductase			12.59	2
	gi|227483199		unnamed protein product			27.71	22
	gi|227482441		unnamed protein product			17.25	11
	gi|227478813		unnamed protein product			32.76	23
	gi|227476678		unnamed protein product			6.96	2
	gi|227468708		unnamed protein product			12.55	3
	gi|227468000		unnamed protein product			22.22	10
	gi|227467998		unnamed protein product			30.23	11
	gi|227308628		unnamed protein product			9.494	2
	gi|227308132		unnamed protein product			8.971	4
	gi|227302422		unnamed protein product			7.386	2
	gi|227250344		unnamed protein product			15.34	3
	gi|227250068		unnamed protein product			5.279	3
	gi|227249719		unnamed protein product			26.7	13
	gi|219981961		unnamed protein product			22.55	6
	gi|219922163		unnamed protein product			22.55	6
	gi|219792645		unnamed protein product			21.41	6
	gi|219788025		unnamed protein product			22.55	6
	gi|219783360		unnamed protein product			22.55	6
	gi|219757019		unnamed protein product			22.55	6
	gi|219754597		unnamed protein product			22.55	6
	gi|219739404		unnamed protein product			21.23	6
	gi|218395433		unnamed protein product			18.47	18
	gi|218331155		unnamed protein product			18.47	18
	gi|218292527		unnamed protein product			7.386	2
	gi|207007141		unnamed protein product			31.34	39
	gi|161486830		lipoprotein NlpI			5	2
	gi|126031656		Chain C, Crystal Structure Of A Phou-Like Protein (So3770) From Shewanella Oneidensis Mr-1 At 2.00 A Resolution			19.38	5
	gi|126031655		Chain B, Crystal Structure Of A Phou-Like Protein (So3770) From Shewanella Oneidensis Mr-1 At 2.00 A Resolution			19.38	5
	gi|126031654		Chain A, Crystal Structure Of A Phou-Like Protein (So3770) From Shewanella Oneidensis Mr-1 At 2.00 A Resolution			19.38	5
	gi|109157944		Chain B, Structure Of [fes]cluster-Free Apo Form Of 6- Phosphogluconate Dehydratase From Shewanella Oneidensis			12.74	7
	gi|109157943		Chain A, Structure Of [fes]cluster-Free Apo Form Of 6- Phosphogluconate Dehydratase From Shewanella Oneidensis			12.74	7
	gi|311818716		unnamed protein product	2.26987	0.016055	25.4	28
	gi|311812026		unnamed protein product			31.34	39
	gi|300665168		unnamed protein product	0.887156	0.42994	12.21	6
	gi|300662960		unnamed protein product	0.946237	0.932178	5.778	3
	gi|300662952		unnamed protein product	0.794328	0.77627	3.926	2
	gi|300660506		unnamed protein product	0.519996	0.0128644	51.31	13
	gi|300657316		unnamed protein product	1.15878	0.752687	8.014	2
	gi|300654474		unnamed protein product			21.23	6
	gi|300653116		unnamed protein product			5.778	3
	gi|300653108		unnamed protein product			3.926	2
	gi|300594829		unnamed protein product	1.55597	0.820047	11.67	6
	gi|300594827		unnamed protein product	0.108643	0.125385	40.94	11
	gi|300593179		unnamed protein product	1.01859	0.918647	4.918	2
	gi|300591475		unnamed protein product			8.014	2
	gi|300591169		unnamed protein product	0.591562	0.598973	18.56	10
	gi|300591167		unnamed protein product	0.862979	0.784894	5.866	3
	gi|300591165		unnamed protein product	0.862979	0.400127	11.17	6
	gi|300590425		unnamed protein product			21.23	6
	gi|300590275		unnamed protein product			12.21	6
	gi|300585463		unnamed protein product			27.35	7
	gi|300582183		unnamed protein product	0.642688	0.465872	14.03	5
	gi|300580799		unnamed protein product	0.92045	0.83808	4.677	2
	gi|300580797		unnamed protein product			3.926	2
	gi|300580795		unnamed protein product	0.831764	0.533225	9.524	3
	gi|300578023		unnamed protein product			5.778	3
	gi|300578015		unnamed protein product			3.926	2
	gi|300577829		unnamed protein product	1.21339	0.690183	7.407	2
	gi|300575875		unnamed protein product			8.014	2
	gi|300575595		unnamed protein product			14.03	5
	gi|300572011		unnamed protein product			24.58	15
	gi|300566683		unnamed protein product	1.00925	0.949033	24.3	14
	gi|300566391		unnamed protein product			8.014	2
	gi|300565787		unnamed protein product			27.35	7
	gi|300565479		unnamed protein product			14.03	5
	gi|300560609		unnamed protein product			5.778	3
	gi|300560601		unnamed protein product			3.926	2
	gi|300558493		unnamed protein product			8.014	2
	gi|300557673		unnamed protein product	0.30479	0.203956	5.449	2
	gi|300557277		unnamed protein product	0.847227	0.624105	22.22	10
	gi|300557275		unnamed protein product	0.691831	0.394175	30.23	11
	gi|300552265		unnamed protein product			5.778	3
	gi|300552257		unnamed protein product			3.926	2
	gi|300551275		unnamed protein product			8.014	2
	gi|300547941		unnamed protein product			24.3	14
	gi|300545639		unnamed protein product			5.449	2
	gi|300543247		unnamed protein product	1.18032	0.726165	37.29	4
	gi|300542199		unnamed protein product	3.25087	0.00625009	16.28	11
	gi|300540131		unnamed protein product	0.809096	0.31999	12.97	8
	gi|300540129		unnamed protein product	1.04713	0.706088	4.498	3
	gi|298550553		unnamed protein product	0.937562	0.99121	2.427	2
	gi|298537842		unnamed protein product			2.427	2
	gi|295799803		unnamed protein product			8.014	2
	gi|295799481		unnamed protein product	0.772681	0.592703	23.59	4
	gi|295799477		unnamed protein product	0.887156	0.67286	32.32	5
	gi|295421407		unnamed protein product	1.02802	0.717169	14.91	5
	gi|295420363		unnamed protein product	0.420727	0.280913	55.28	26
	gi|295414752		unnamed protein product			55.28	26
	gi|24371603	trmE	tRNA modification GTPase TrmE	0.954993	0.882667	2.188	2
